# Supplementary material
Source: publisher figshare collection journal article supplement (https://gsapubs.figshare.com/ndownloader/files/23313071)
Supplement: Supplementary file 2 [file 23313071]

Archive with 4 entries (4 files):
- doc.kml
- 2018350-Appendix A Lhasa River.xls
- 2018350-Appendix Lhasa Text & Captions.pdf
- 2018350-Summary.pdf
