# Supplementary material
Source: publisher figshare collection journal article supplement (https://gsapubs.figshare.com/ndownloader/files/23313071)
Supplement: Supplementary file 2 [file 23313071 › 2018350-Appendix A Lhasa River.xls]

## Sheet: Table A1 Samples
GSA Data Repository Item 2018350
Accompanies Garzanti, E., Limonta, M., Vezzoli, G., An, W., Wang, J., and Hu, X., 2018, Petrology and multimineral fi ngerprinting of modern sand generated from a dissected magmatic arc
(Lhasa River, Tibet), in Ingersoll, R.V., et al., eds., Tectonics, Sedimentary Basins, and Provenance: A Celebration of William R. Dickinson’s Career: GSA Special Paper 540, https://doi.org/10.1130/2018.2540(09).
Table A1
			Collected by/ received from
Sample	River	Locality		Year	Latitude	Longitude	Drainage
	LHASA RIVER BASIN
S4674	Miggi	Pangduo	E.Garzanti/G.Sun/J.Li	2013	30°12'08" N	91°21'18" E	Lhasa
S4670	Nyainqêntanglha	Duiling	E.Garzanti/G.Sun/J.Li	2013	30°17'53" N	90°46'58" E	Dam
S4672	Womaguo	Womaguo	E.Garzanti/G.Sun/J.Li	2013	30°22'31" N	90°56'47" E	Nyainqêntanglha
S4671	Dam	Quxiama	E.Garzanti/G.Sun/J.Li	2013	30°24'23" N	90°58'46" E	Lhasa
S4673	Dam	Zhanai	E.Garzanti/G.Sun/J.Li	2013	30°13'25" N	91°19'05" E	Lhasa
S5297	Lhasa	Jiangga	J-G. Wang	2017	30°02ʹ58ʺ N	91°48ʹ47ʺ E	Yarlung Tsangpo
S5298	Drigung	Qimaka	J-G. Wang	2017	30°00ʹ09ʺ N	91°55'49" E	Lhasa
S5299	Jiamogang	Zhikong	J-G. Wang	2017	29°58ʹ55ʺ N	91°54'30" E	Lhasa
S5300	Lhasa	Gongmo	J-G. Wang	2017	29°55ʹ54ʺ N	91°51ʹ03ʺ E	Yarlung Tsangpo
S4675	Maizho	Maizhokunggar	E.Garzanti/G.Sun/J.Li	2013	29°50'31" N	91°44'24" E	Lhasa
S5301	Pengbo	Jiongba	J-G. Wang	2017	29°51'25" N	91°21'02" E	Lhasa
S4665	Lhasa	Lhasa	E.Garzanti/G.Sun/J.Li	2013	29°38'29" N	91°08'50" E	Yarlung Tsangpo
S4667	Yangbajain	Yangbajain	E.Garzanti/G.Sun/J.Li	2013	30°04'55" N	90°31'55" E	Duilong
S4668	Gurum	Yangbajain	E.Garzanti/G.Sun/J.Li	2013	30°06'02" N	90°31'41" E	Duilong
S4669	Nu	Yangbajain	E.Garzanti/G.Sun/J.Li	2013	30°05'44" N	90°32'34" E	Duilong
S4666	Duilong	Dagang	E.Garzanti/G.Sun/J.Li	2013	29°39'33" N	90°57'17" E	Lhasa
TSA-4	Lhasa	Galashan	J. Lavé/C.F.Lanord	2007	29°26' N	90°56' E	Yarlung Tsangpo
S4676	Lhasa	Galashan	E.Garzanti/G.Sun/J.Li	2013	29°22'44" N	90°51'38" E	Yarlung Tsangpo
16A002	Lhasa	Quxu	X. Hu/R,Guo/H.Fu	2016	29°22′27″ N	90°51′34″ E	Yarlung Tsangpo
	YARLUNG TSANGPO BASIN
S4706	Raka Tsangpo	Sangsang	E.Garzanti/X.Hu	2013	29°27'18" N	86°41'20" E	Yarlung Tsangpo
S4758	Raka Tsangpo	Shazhuo	W. An	2013	29°24'57" N	87°55'29" E	Yarlung Tsangpo
TSA-1A	Yarlung Tsangpo	Xigaze	J. Lavé/C.F.Lanord	2007	29°20' N	88°50' E	Brahmaputra
16A063	Yarlung Tsangpo	Xigaze	X. Hu/R,Guo/H.Fu	2016	29°19'14" N	88°51'28" E	Brahmaputra
S1	Yarlung Tsangpo	Xigaze	E.Garzanti/C.Miradoli	1994	29°20' N	88°58' E	Brahmaputra
S4757	Xiang Chu	Chongdui	W. An	2013	29°25'56" N	89°05'35" E	Yarlung Tsangpo
#1	Nyemo	Nyemo	C. France-Lanord	2001	29°22' N	90°11' E	Yarlung Tsangpo
S4678	Nyemo	Luowa	E.Garzanti/G.Sun/J.Li	2013	29°21'20" N	90°11'25" E	Yarlung Tsangpo
S4677	Yarlung Tsangpo	Daga	E.Garzanti/G.Sun/J.Li	2013	29°19'57" N	90°40'56" E	Brahmaputra
S4664	Yarlung Tsangpo	Jiazhulinzhen	E.Garzanti	2013	29°19'42" N	90°51'47" E	Brahmaputra
#2	Yarlung Tsangpo	Gonggar	C. France-Lanord	2001	29°18' N	90°58 E	Brahmaputra
TSA-3	Yarlung Tsangpo	Gonggar	J. Lavé/C.F.Lanord	2007	29°18' N	91°00' E	Brahmaputra
16A064	Yarlung Tsangpo	Gonggar	X. Hu/R,Guo/H.Fu	2016	29°16'50" N	91°10'29" E	Brahmaputra
	LADAKH RIVERS
S4421	Nyoma	Nyoma	H.Munack/J.Blöthe	2011	33°12'40" N	78°39'28" E	Indus
S4422	Nogo	Nogo	H.Munack/J.Blöthe	2011	33°14'37" N	78°34'39" E	Indus
S4423	Chuma	Chumathang	H.Munack/J.Blöthe	2011	33°21'36" N	78°21'16" E	Indus
S4424	Ligchi	Ligchi	H.Munack/J.Blöthe	2011	33°43'57" N	77°57'51" E	Indus
S4425	Igoo	Igoo	H.Munack/J.Blöthe	2011	33°53'27" N	77°46'58" E	Indus
S4426	Stagmo	Stagmo	H.Munack/J.Blöthe	2011	34°07'05" N	77°42'00" E	Indus
S4211	Leh	Leh	A.Resentini	2011	34°10'03" N	77°34'28" E	Indus
S4427	Phyang	Phyang	H.Munack/J.Blöthe	2011	34°12'04" N	77°30'34" E	Indus
S4428	Humla	Humla	H.Munack/J.Blöthe	2011	34°13'13" N	77°23'17" E	Indus
S1680	Basgo	Basgò	H.Sinclair	2001	34°13'31" N	77°16'24" E	Indus
S4429	Nurla	Nurla	H.Munack/J.Blöthe	2011	34°18'16" N	76°59'12" E	Indus
S4430	Domkar	Domkar	H.Munack/J.Blöthe	2011	34°23'30" N	76°46'25" E	Indus
S4431	Skyur	Skurbuchan	H.Munack/J.Blöthe	2011	34°26'07" N	76°42'18" E	Indus
S4432	Hanu Thang	Hanu Thang	H.Munack/J.Blöthe	2011	34°34'00" N	76°35'18" E	Indus

## Sheet: Table A2PT
Table A2
River	Site	Sample	Operator	GSZ	Q	KF	P	Lvf	Lvm	Lc	Lh	Lp	Lms	Lmv	Lmf	Lmb	Lu	mica	HM		MI*	MI	Q	F	L		Q	P	K		Lm	Lv	Ls		Qp/Q	P/F	Mic/F
LHASA RIVER BASIN				(mm)
Miggi	Pangduo	S4674	G.Vezzoli	150	46.4674	17.3913	16.8478	0.815217	0	0	0	3.80435	6.25	0.543478	4.21196	0.13587	0	2.71739	0.815217	100	264.912	186.42	48.169	35.493	16.338	100	57.5758	20.8754	21.5488	100	49.1379	6.89655	43.9655	100	21.3333	49.2063	12.5
Nyainqêntanglha	Duiling	S4670	G.Vezzoli	360	49.8645	19.5122	21.4092	0	0.271003	0	0	0.271003	0.271003	0	0.677507	0.135501	0	3.79404	3.79404	100	400	327.273	53.9589	44.2815	1.75953	100	54.9254	23.5821	21.4925	100	58.3333	16.6667	25	100	12.1387	52.3179	0.763359
Womaguo	Womaguo	S4672	G.Vezzoli	790	15.427	1.10193	3.85675	0.275482	0	0	0	15.7025	61.4325	0.826446	1.37741	0	0	0	0	100	113.6	90.7348	15.427	4.95868	79.6143	100	75.6757	18.9189	5.40541	100	40.8304	0.865052	58.3045	100	24.2424	77.7778	0
Upper Dam	Quxiama	S4671	G.Vezzoli	840	40.3846	6.59341	5.76923	2.41758	0.604396	0	0	12.0879	21.7033	1.64835	8.24176	0	0	0.274725	0.274725	100	188.321	123.445	40.6077	12.4309	46.9613	100	76.5625	10.9375	12.5	100	42.6471	8.23529	49.1176	100	23.6364	46.6667	3.33333
Dam	Zhanai	S4673	G.Vezzoli	190	52.3546	13.2964	14.4044	1.89949	0.316581	0	0	7.20222	4.70914	0.277008	0.969529	0.138504	0	2.21607	2.21607	100	211.111	90.4762	54.7826	28.9855	16.2319	100	65.3979	17.9931	16.609	100	23.2143	15.1786	61.6071	100	11.6022	52	3.26087
Lhasa	Jiangga	S5297	G.Vezzoli	330	35.8065	15.8065	18.0645	0.967742	1.93548	0	0	4.83871	13.871	1.6129	3.22581	0	0	1.6129	2.25806	100	176.923	129.213	37.2483	35.2349	27.5168	100	51.3889	25.9259	22.6852	100	41.4634	14.0244	44.5122	100	24.7423	53.3333	13.9535
Drigung	Qimaka	S5298	G.Vezzoli	450	35.625	14.375	21.875	0.3125	0	0.625	0	5.625	10	1.875	4.375	0.625	0	3.125	1.5625	100	233.333	181.176	37.377	38.0328	24.5902	100	49.5652	30.4348	20	100	46.6667	5.33333	48	100	19.6078	60.3448	6
Jiamogang	Zhikong	S5299	G.Vezzoli	400	29.2581	11.3898	20.4807	0.626959	0.940439	0	0	3.1348	7.83699	11.5987	5.48589	2.66458	0	2.19436	4.38871	100	214.706	176.613	31.2081	33.8926	34.8993	100	47.8632	33.5043	18.6325	100	55.3398	22.8155	21.8447	100	15.0685	64.3564	9.7561
Lhasa	Gongmo	S5300	G.Vezzoli	260	27.2727	10.2639	24.6334	1.46628	0.58651	0.293255	0	2.6393	9.38416	3.81232	3.37243	3.37243	0	0	12.9032	100	273.196	234.513	31.3131	40.0673	28.6195	100	43.8679	39.6226	16.5094	100	53.5294	15.8824	30.5882	100	16.6667	70.5882	0.970874
Maizho	Maizhokunggar	S4675	G.Vezzoli	600	25.6621	7.30594	27.3059	6.7699	8.29859	0	0	3.56164	11.5068	4.10959	2.73973	0.547945	0.273973	1.91781	0	100	189.873	90.3614	25.9777	34.9162	39.1061	100	42.5758	45.303	12.1212	100	30.0725	45.2899	24.6377	100	19.403	79.2	0
Pengbo	Jiongba	S5301	G.Vezzoli	170	17.1254	7.33945	20.4893	5.50459	6.42202	1.07034	0	9.48012	18.8073	9.48012	0.611621	0.611621	0	0.611621	2.44648	100	129.897	73.6842	17.6656	28.7066	53.6278	100	38.0952	45.5782	16.3265	100	29.5588	32.0588	38.3824	100	18	73.6264	0
Lhasa	Lhasa	S4665	G.Vezzoli	340	37.4317	8.46995	14.4809	7.42828	4.8668	0	0	6.55738	10.3825	3.00546	5.87432	0.136612	0	1.0929	0.273224	100	218.072	109.036	37.9501	23.2687	38.7812	100	61.991	23.9819	14.0271	100	33.2143	36.0714	30.7143	100	27.2727	63.0952	4.16667
Yangbajain	Yangbajain	S4667	G.Vezzoli	380	47.4255	21.6802	24.1192	1.51762	0.650407	0	0	0.271003	0	0.813008	0.813008	0	0	0.813008	1.89702	100	323.077	168	48.7465	47.0752	4.17827	100	50.8721	25.8721	23.2558	100	30	63.3333	6.66667	100	7.36196	52.6627	0
Gurum	Yangbajain	S4668	G.Vezzoli	210	50.9383	21.4477	22.7882	0.268097	0	0	0	0	0.268097	0.268097	0.268097	0	0	2.68097	1.07239	100	220	183.333	52.9248	45.961	1.11421	100	53.5211	23.9437	22.5352	100	50	37.5	12.5	100	3.22581	51.5152	0.645161
Nu	Yangbajain	S4669	G.Vezzoli	420	39.9441	26.5363	29.3296	0.139665	0.139665	0	0.27933	0	0.27933	0.837989	0.27933	0	0	1.39665	0.837989	100	300	253.846	40.8571	57.1429	2	100	41.691	30.6122	27.6968	100	42.8571	35.7143	21.4286	100	8.20896	52.5	0.558659
Duilong	Dagang	S4666	G.Vezzoli	230	44.4444	18.1572	20.8672	5.22962	3.98447	0	0	1.35501	0.542005	2.71003	1.08401	0	0	1.08401	0.542005	100	185.714	61.9048	45.1791	39.6694	15.1515	100	53.2468	25	21.7532	100	18.1818	70.9091	10.9091	100	9.86842	53.4722	2.38095
Lhasa	Galashan	TSA-4	G.Vezzoli	270	40.2402	12.9129	24.024	3.003	3.3033	0	0.3003	3.003	5.70571	0.900901	3.003	0.3003	0	2.1021	1.2012	100	216.216	114.286	41.6149	38.1988	20.1863	100	52.1401	31.1284	16.7315	100	33.8462	34.6154	31.5385	100	22.4138	65.0407	5.26316
Lhasa	Galashan	S4676	G.Vezzoli	160	41.4835	13.1868	15.9341	3.02198	2.47253	0	0	5.76923	6.86813	2.1978	2.74725	0.274725	0	3.84615	2.1978	100	205.769	108.081	44.152	30.9942	24.8538	100	58.7549	22.5681	18.677	100	32.3529	28.2353	39.4118	100	20.3008	54.717	2.9703
Lhasa	Quxu	16A002	G.Vezzoli	180	39.5349	15.1163	21.2209	0.581395	0.290698	0	0	2.32558	6.68605	5.23256	2.61628	0	0	3.77907	2.61628	100	171.667	145.07	42.236	38.8199	18.9441	100	52.1073	27.9693	19.9234	100	48.3607	19.6721	31.9672	100	19.2308	58.4	5.66038
YARLUNG TSANGPO BASIN
Upper Raka	Sangsang	S4706	G.Vezzoli	400	25.4795	4.38356	8.76712	3.3242	3.79909	0.684932	1.36986	34.6575	9.58904	6.84932	0	0.273973	0	0.273973	0.547945	100	123.077	33.8266	25.6906	13.2597	61.0497	100	65.9574	22.695	11.3475	100	14.0271	17.4208	68.552	100	14.4737	66.6667	10.8108
Raka	Shazhuo	S4758	G.Vezzoli	170	37.4887	9.30443	16.8925	5.42005	1.35501	0	0	11.1111	6.50407	3.79404	1.89702	0	0	3.25203	2.98103	100	166	69.7479	39.9807	27.9383	32.0809	100	58.8652	26.5248	14.6099	100	23.4234	28.8288	47.7477	100	15.9091	64.4828	3.33333
Yarlung	Xigaze	16A063	G.Vezzoli	270	33.6986	10.9589	20.8219	1.79328	0.672478	2.60274	0.273973	3.83562	11.0959	4.10959	4.38356	0	0.547945	2.19178	3.0137	100	190.123	145.283	35.5491	33.526	30.9249	100	51.4644	31.7992	16.7364	100	41.8224	16.3551	41.8224	100	15.7407	65.5172	5.10204
Yarlung	Xigaze	TSA-1A	G.Vezzoli	620	37.9658	13.4945	15.005	8.21375	9.30891	0	0.302115	6.64653	3.62538	0.906344	1.20846	0	1.20846	0.906344	1.20846	100	215.385	47.8632	38.786	29.1152	32.0988	100	57.1212	22.5758	20.303	100	12.9808	59.1346	27.8846	100	24.5283	52.6502	9.85915
Yarlung	Xigaze	S1	G.Vezzoli	430	28.2468	3.8961	2.5974	0.865801	0.4329	5.19481	0.649351	33.2792	17.6948	1.2987	2.27273	0	1.94805	0	1.62338	100	143.421	59.0786	28.7129	6.60066	64.6865	100	81.3084	7.47664	11.215	100	20.0255	4.59184	75.3827	100	34.2857	40	0
Xiang	Chongdui	S4757	G.Vezzoli	250	26.1456	9.16442	19.407	4.85175	6.73854	0.539084	0.269542	4.58221	9.43396	9.97305	3.77358	0	0	3.2345	1.88679	100	159.794	96.2733	27.5568	30.1136	42.3295	100	47.7833	35.468	16.7488	100	33.557	41.2752	25.1678	100	16.4706	67.9245	4.49438
Nyemo	Nyemo	#1	G.Vezzoli	290	33.6634	14.1914	39.604	0.660066	0.660066	0	0	0	0	0	2.31023	0	0	5.28053	3.63036	100	392.308	329.032	36.9565	59.058	3.98551	100	38.4906	45.283	16.2264	100	63.6364	36.3636	0	100	6.75676	73.6196	2.3622
Nyemo	Luowa	S4678	G.Vezzoli	240	27.9891	11.9565	31.7935	0.271739	0.815217	0.13587	0	1.49457	2.17391	3.53261	0.815217	0	0	5.43478	13.587	100	173.077	123.288	34.5638	54.0268	11.4094	100	39.0152	44.3182	16.6667	100	39.7059	30.8824	29.4118	100	7.14286	72.6708	0.657895
Yarlung	Daga	S4677	G.Vezzoli	260	32.0442	8.56354	17.9558	2.09484	1.49632	1.10497	0	7.45856	13.8122	2.20994	3.03867	0	0.828729	4.69613	4.69613	100	168.493	102.929	35.3659	29.2683	35.3659	100	54.717	30.6604	14.6226	100	35.7759	15.9483	48.2759	100	7.61905	67.7083	2.29885
Yarlung	Jiazhulinzhen	S4664	G.Vezzoli	310	35.5742	10.084	20.1681	3.64146	3.08123	0.280112	0.280112	4.48179	6.44258	1.96078	3.08123	1.68067	0.560224	3.36134	5.32213	100	212.766	114.943	38.9571	33.1288	27.9141	100	54.0426	30.6383	15.3191	100	36.2637	31.3187	32.4176	100	12.0968	66.6667	2.94118
Yarlung	Gonggar	#2	G.Vezzoli	110	36.1635	8.1761	10.6918	1.16801	2.92004	2.35849	0	13.3648	9.43396	2.51572	4.40252	0.314465	1.57233	1.88679	5.03145	100	193.103	100.901	38.8514	20.2703	40.8784	100	65.7143	19.4286	14.8571	100	30.1653	16.1157	53.719	100	5.66038	56.6667	3.92157
Yarlung	Gonggar	TSA-3	G.Vezzoli	140	29.2035	10.3245	15.0442	3.53982	4.42478	1.9174	0.589971	8.70206	11.2094	1.17994	4.57227	0.147493	0.294985	6.78466	2.0649	100	210.769	109.6	32.0388	27.8317	40.1294	100	53.5135	27.5676	18.9189	100	30.2419	23.7903	45.9677	100	18.6813	59.3023	4
Yarlung	Gonggar	16A064	G.Vezzoli	280	30.3571	7.14286	9.22619	1.65816	2.21088	0.595238	0.595238	5.50595	27.8274	5.35714	6.25	0.297619	0.297619	0.892857	1.78571	100	158.108	123.483	31.1927	16.8196	51.9878	100	64.9682	19.7452	15.2866	100	46.0294	13.2353	40.7353	100	24.6914	56.3636	12.2449
LADAKH RIVERS
Nyoma	Nyoma	S4421	A.Resentini	327.767	47.7064	15.2905	24.4648	0	0.30581	0	0	0.30581	0.611621	0.30581	4.12844	0.458716	0	3.66972	2.75229	100	391.892	362.5	50.9804	42.4837	6.53595	100	54.5455	27.972	17.4825	100	82.5	7.5	10	100	6.61765	61.5385	3.6036
Nogo	Nogo	S4422	A.Resentini	394.597	38.2979	10.0304	29.7872	0	0	0.607903	0	10.6383	3.03951	0.303951	1.67173	0.455927	0	1.82371	3.34347	100	350.943	204.396	40.3846	41.9872	17.6282	100	49.0272	38.1323	12.8405	100	22.7273	0.909091	76.3636	100	32.9787	74.8092	5.20833
Chuma	Chumathang	S4423	A.Resentini	233.157	35.5828	9.5092	29.7546	0	0	0	0	0	0	0.306748	2.76074	0.306748	0	1.53374	20.2454	100	379.31	379.31	45.4902	50.1961	4.31373	100	47.541	39.7541	12.7049	100	95.4545	4.54545	0	100	17.3077	75.7812	1.83486
Ligchi	Ligchi	S4424	A.Resentini	315.825	43.7888	11.1801	22.6708	0	0	0	0	0	0	0	2.63975	0.465839	0	7.45342	11.8012	100	411.628	393.333	54.2308	41.9231	3.84615	100	56.4	29.2	14.4	100	100	0	0	100	23.7705	66.9725	7.40741
Igoo	Igoo	S4425	A.Resentini	304.319	41.4634	14.6341	28.6585	0	0	0.152439	0	0	0	0	2.28659	0	0	5.4878	7.31707	100	427.778	427.778	47.5524	49.6503	2.7972	100	48.9209	33.8129	17.2662	100	93.75	0	6.25	100	18.1102	66.1972	4.31034
Stagmo	Stagmo	S4426	A.Resentini	164.131	28.9086	7.07965	33.0383	0	0	0.294985	0	0	0	0	0.589971	0	0	8.84956	21.2389	100	455.556	455.556	41.3502	57.384	1.26582	100	41.8803	47.8632	10.2564	100	66.6667	0	33.3333	100	5.19481	82.3529	0.854701
Leh	Leh	S4211	A.Resentini	154.286	39.0909	13.6364	23.9394	0	0	0.30303	0	0.606061	0	0	0.909091	0.30303	0	8.78788	12.4242	100	450	420	49.6154	47.6923	2.69231	100	50.9881	31.2253	17.7866	100	57.1429	0	42.8571	100	27.193	63.7097	1.90476
Phyang	Phyang	S4427	A.Resentini	162.113	34.0237	9.46746	29.2899	0	0	0	0	0	0	0	2.07101	0.887574	0	5.32544	18.9349	100	390.909	390.909	44.9219	51.1719	3.90625	100	46.748	40.2439	13.0081	100	100	0	0	100	15.8416	75.5725	4.38596
Humla	Humla	S4428	A.Resentini	195.185	37.8125	8.4375	19.0625	0	0	0.625	0	0	0	0	0.625	0	0	6.5625	26.875	100	443.75	443.75	56.8075	41.3146	1.87793	100	57.8947	29.1866	12.9187	100	50	0	50	100	10.3774	69.3182	1.25
Basgo	Basgò	S1680	G.Vezzoli	445.347	26.9841	16.78	40.5896	0.255102	0.765306	0.680272	0.680272	1.02041	0.680272	0	0.510204	0.170068	0.340136	1.70068	8.84354	100	325	226.087	30.1648	64.1318	5.70342	100	31.9892	48.1183	19.8925	100	23.3333	23.3333	53.3333	100	33.9286	70.751	4.0404
Nurla	Nurla	S4429	A.Resentini	238.641	30.8411	5.919	31.4642	0	0	0.778816	0	5.76324	5.919	0	0.623053	0.311526	0	3.11526	15.2648	100	212.903	133.333	37.7863	45.8015	16.4122	100	45.2055	46.1187	8.6758	100	29.0698	0	70.9302	100	15.5556	84.1667	4.54545
Domkar	Domkar	S4430	A.Resentini	351.111	39.8176	13.6778	28.8754	0	0	0.151976	0	0.455927	0	0.303951	0.911854	0.303951	0	2.43161	13.0699	100	403.125	373.913	47.1223	50.3597	2.51799	100	48.3395	35.0554	16.6052	100	64.2857	7.14286	28.5714	100	18.4211	67.8571	1.9802
Skyur	Skurbuchan	S4431	A.Resentini	420.448	40.3727	12.4224	35.0932	0	0	0.621118	0	0	0.310559	0	1.24224	1.24224	0	4.65839	4.03727	100	410.256	400	44.2177	52.0408	3.7415	100	45.9364	39.9293	14.1343	100	77.2727	0	22.7273	100	11.9266	73.8562	7.27273
Hanu Thang	Hanu Thang	S4432	A.Resentini	293.232	35.0148	9.79228	28.4866	0	0.296736	4.00593	0	0.74184	2.67062	0	2.22552	1.33531	0.296736	2.67062	12.4629	100	369.091	344.068	41.2587	45.1049	13.6364	100	47.7733	38.8664	13.3603	100	43.5897	3.84615	52.5641	100	24.0385	74.4186	0

## Sheet: Table A3HM
Table A3
River	Site	Sample	Class	%finer	%class	%coarser	Method	Operator	HM %weight	tHM %weight	zircon	tourmaline	rutile	titanite	apatite	epidote	allanite	garnet	chloritoid	staurolite	andalusite	kyanite	sillimanite	amphibole	clinopyroxene	enstatite	hypersthene	other tHM	Total	ZTR	HCI	MMI	% transparent	% opaque	% Fe Oxide	% Ti Oxide	% turbid HM	% rock fragments	% soils, turbids	% chlorite	% biotite	% carbonates	% light minerals	Total
LHASA RIVER BASIN			(mm)
Miggi	Pangduo	S4674	32-500	0.00434951	0.991978	0.00367292	Point	M.Limonta	1.56135	1.34108	5.31401	0.483092	0.966184	2.89855	3.86473	34.2995	0.483092	7.72947	0	0	0.483092	0	0	39.1304	4.34783	0	0	0	100	6.76329	7.55556	n.d.	0.398844	0.0250482	0.026975	0.00578035	0.00770713	0.0346821	0.144509	0.294798	0.061657	0	0	1
Nyainqêntanglha	Duiling	S4670	32-500	0.00264017	0.792746	0.204613	Point	M.Limonta	4.75549	4.44869	2.46305	0	0	1.97044	1.97044	2.46305	0.492611	13.7931	0	0	0	0	0	76.3547	0.492611	0	0	0	100	2.46305	8	n.d.	0.90625	0.0625	0	0	0	0	0.03125	0	0	0	0	1
Womaguo	Womaguo	S4672	32-500	0.0595525	0.525473	0.414974	Point	M.Limonta	0.614929	0.516933	3.31754	0	1.4218	4.2654	2.8436	11.3744	0.947867	6.16114	0.473934	0.473934	0.947867	0	0	46.9194	20.3791	0	0.473934	0	100	4.73934	4.96454	37.5	0.483945	0.0504587	0.0252294	0.0114679	0.00458716	0.0527523	0.259174	0.0366972	0.0412844	0	0.0344037	1
Upper Dam	Quxiama	S4671	32-500	0.0456055	0.534747	0.419647	Point	M.Limonta	1.4329	1.17394	8.33333	0.490196	0.490196	1.96078	5.88235	19.1176	0	21.0784	1.47059	1.96078	0	0	0	36.7647	2.45098	0	0	0	100	9.31373	13.5417	28.5714	0.535433	0.0393701	0.0682415	0.00787402	0.00262467	0.0341207	0.215223	0.00524934	0.0813648	0.00262467	0.00787402	1
Dam	Zhanai	S4673	32-500	0.0394123	0.881465	0.0791224	Point	M.Limonta	4.32551	3.81013	6.28019	0	0.483092	3.86473	4.83092	6.76329	0.483092	4.83092	0	0	0	0	0	71.0145	1.44928	0	0	0	100	6.76329	6.90476	n.d.	0.648903	0.0815047	0	0.00626959	0	0.00626959	0.0783699	0.0250784	0.153605	0	0	1
Lhasa	Jiangga	S5297	32-500	0.0174782	0.936618	0.0459042	Point	M.Limonta	3.31335	2.56404	3.65297	0.913242	0	4.56621	2.28311	14.6119	0	27.8539	0	0	0	0	1.36986	39.2694	2.73973	0.456621	0	2.28311	100	4.56621	16.25	n.d.	0.636628	0.177326	0.00872093	0	0	0.0232558	0.110465	0.0174419	0.0261628	0	0	1
Drigung	Qimaka	S5298	32-500	0.0103554	0.410748	0.578897	Point	M.Limonta	2.98175	2.74214	0	0	0	10.1942	1.94175	13.1068	0	10.1942	0	0	0	0	0	62.1359	2.42718	0	0	0	100	0	24.2138	n.d.	0.614925	0.0268657	0.0208955	0.00597015	0	0.0656716	0.2	0.0298507	0.0358209	0	0	1
Jiamogang	Zhikong	S5299	32-500	0.0249549	0.603753	0.371292	Point	M.Limonta	3.9328	3.89672	1.47059	0	0	0.490196	0.490196	45.5882	0	1.47059	0.490196	0	0	0	0	48.5294	0.980392	0	0	0.490196	100	1.47059	30.5221	n.d.	0.469565	0.00434783	0	0	0	0.208696	0.317391	0	0	0	0	1
Lhasa	Gongmo	S5300	32-500	0.0251774	0.775093	0.19973	Point	M.Limonta	16.3218	15.5556	2.46305	0	0.985222	1.97044	0.492611	47.2906	0	4.4335	0	0	0	0	0	40.3941	1.97044	0	0	0	100	3.44828	25	n.d.	0.735507	0.0326087	0.00362319	0	0	0.0471014	0.15942	0.0144928	0.00362319	0.00362319	0	1
Maizho	Maizhokunggar	S4675	32-500	0.00260792	0.401398	0.595994	Point	M.Limonta	1.22214	0.883326	2.28311	2.28311	0	3.65297	1.82648	23.7443	0	8.21918	1.36986	0	0	0	0	56.1644	0.456621	0	0	0	100	4.56621	19.0909	n.d.	0.434524	0.109127	0.0416667	0.00396825	0.0119048	0.0357143	0.232143	0.0496032	0.0793651	0	0.00198413	1
Pengbo	Jiongba	S5301	32-500	0.0426586	0.940142	0.0171995	Point	M.Limonta	3.12566	2.75569	2.31481	0	0	4.62963	2.77778	28.7037	0	18.9815	0	0	0	0	0	35.1852	5.55556	0	0.925926	0.925926	100	2.31481	24.6575	n.d.	0.574468	0.0292553	0.0398936	0.00797872	0	0.0558511	0.279255	0.00797872	0.00531915	0	0	1
Lhasa	Lhasa	S4665	32-500	0.00193884	0.949061	0.0489997	Point	M.Limonta	1.55492	1.30513	3.34928	1.91388	0	4.78469	2.39234	19.1388	0.478469	7.6555	0.478469	0	0.478469	0	0	55.9809	3.34928	0	0	0	100	5.26316	13.7255	n.d.	0.530457	0.0253807	0.0304569	0.00761421	0.0380711	0.0532995	0.218274	0.0329949	0.0583756	0	0.00507614	1
Yangbajain	Yangbajain	S4667	32-500	0.00271897	0.877193	0.120088	Point	M.Limonta	1.52524	1.34116	4.90196	1.96078	0	2.94118	7.84314	2.94118	0	4.90196	0	0	0	0	0	71.0784	2.94118	0	0.490196	0	100	6.86275	16.3978	n.d.	0.576271	0.039548	0.00564972	0.0254237	0.00847458	0.00564972	0.129944	0.0338983	0.172316	0.00282486	0	1
Gurum	Yangbajain	S4668	32-500	0.00528647	0.985284	0.00942992	Point	M.Limonta	1.50217	1.34861	2.47525	0	0.990099	3.46535	5.44554	4.9505	1.9802	7.92079	0	0	0.49505	0	2.9703	63.8614	5.44554	0	0	0	100	3.46535	8	92.8571	0.528796	0.0575916	0	0	0.0026178	0.0052356	0.0314136	0.0445026	0.311518	0.0183246	0	1
Nu	Yangbajain	S4669	32-500	0.00341134	0.660094	0.336495	Point	M.Limonta	0.787921	0.588776	5.39216	0.980392	0	2.94118	11.2745	5.39216	0.980392	5.88235	0	0	0.490196	0	0	63.7255	2.94118	0	0	0	100	6.37255	8.75706	n.d.	0.334975	0.110016	0	0.00328407	0	0.00656814	0.0591133	0.0689655	0.407225	0.00656814	0.00328407	1
Duilong	Dagang	S4666	32-500	0.0687404	0.751856	0.179403	Point	M.Limonta	1.99386	1.67737	2.64151	0.377358	0	4.15094	4.5283	16.6038	1.13208	13.9623	0	0	1.13208	0	1.13208	46.7925	6.79245	0	0.754717	0	100	3.01887	22.695	75	0.572354	0.0842333	0.0107991	0.0107991	0.00215983	0.0215983	0.103672	0.0215983	0.166307	0.00215983	0.00431965	1
Lhasa	Galashan	TSA-4	32-500	0.00567077	0.974644	0.0196857	Area	S.Andò	2.38614	1.97709	3.44828	1.47783	0.492611	2.46305	4.4335	20.197	0.492611	3.94089	0	0	0	0	0.985222	53.6946	6.89655	0	0.985222	0.492611	100	5.41872	3.30033	n.d.	0.623853	0.125382	0	0	0	0.0948012	0	0.0519878	0.0856269	0	0.0183486	1
Lhasa	Galashan	S4676	32-500	0.00885955	0.98645	0.00469035	Point	M.Limonta	3.22138	2.74216	6.79612	0	0	4.36893	4.36893	13.5922	0.485437	5.33981	0.485437	0	0.485437	0	0	61.165	2.42718	0	0	0.485437	100	6.79612	11.6809	n.d.	0.562842	0.079235	0.00819672	0.00546448	0.00546448	0.0218579	0.188525	0.0464481	0.0819672	0	0	1
Lhasa	Quxu	16A002	32-500	0.109409	0.886297	0.00429436	Point	M.Limonta	2.47227	2.13871	1.80995	2.71493	0	0.904977	2.71493	29.4118	0	6.33484	0	0	0.904977	0	0	52.0362	1.80995	0	0	1.35747	100	4.52489	10.2564	n.d.	0.5	0.0688073	0.00458716	0.00458716	0	0.00458716	0.114679	0.0275229	0.275229	0	0	1
YARLUNG TSANGPO BASIN
Upper Raka	Sangsang	S4706	32-500	0.0557504	0.534161	0.410088	Point	M.Limonta	1.49914	1.13624	6.84411	4.56274	1.14068	6.08365	4.18251	20.5323	0	7.98479	0.760456	0.760456	0.760456	0	1.90114	38.7833	5.70342	0	0	0	100	12.5475	14.8148	63.6364	0.558386	0.131635	0.0318471	0.0127389	0.00212314	0.0127389	0.233546	0.00212314	0.00849257	0	0.00636943	1
Raka	Shazhuo	S4758	32-500	0.0551098	0.743028	0.201862	Point	M.Limonta	2.04385	1.7758	2.35849	2.35849	0	4.71698	2.83019	16.0377	0	1.41509	0	0	0	0	0.471698	58.9623	9.90566	0.471698	0.471698	0	100	4.71698	12.012	n.d.	0.538071	0.0482234	0.0228426	0.0101523	0	0.0253807	0.271574	0.0126904	0.0152284	0	0.0558376	1
Yarlung	Xigaze	16A063	32-500	0.0579207	0.535015	0.407065	Point	W.Liang	2.32933	1.95252	0	2.88462	0	2.40385	6.25	35.0962	0	2.88462	0.961538	0.480769	0	0	0.480769	41.3462	3.36538	0.961538	0	2.88462	100	2.88462	4.41767	33.3333	0.43346	0.0646388	0	0.0190114	0	0.0152091	0.387833	0.0342205	0.00760456	0.026616	0.0114068	1
Yarlung	Xigaze	TSA-1A	32-500	0	0.893745	0.106255	Area	S.Andò	1.8052	1.38167	1.50754	4.0201	0	5.02513	3.51759	20.603	0.502513	5.02513	7.53769	0.502513	0	0.502513	0	35.6784	12.5628	2.01005	0.502513	0.502513	100	5.52764	2.45098	5.88235	0.505995	0.117506	0	0	0	0.28777	0	0.0335731	0.0191847	0.00479616	0.0311751	1
Yarlung	Xigaze	S1	63-250	n.d.	n.d.	n.d.	Area	S.Andò	1.40903	1.2871	1.05263	7.89474	0.526316	0	0	29.4737	0	15.2632	5.78947	1.05263	0.526316	0	3.68421	22.6316	6.84211	2.63158	1.57895	1.05263	100	9.47368	28.3333	40.4762	0.38	0.036	0	0	0	0.516	0	0.046	0.01	0	0.012	1
Xiang	Chongdui	S4757	32-500	0.0264368	0.935753	0.03781	Point	M.Limonta	3.12184	2.7135	1.94175	1.94175	0	0.485437	3.39806	14.5631	0	1.94175	0.485437	0	0	0	0	67.9612	5.82524	0.485437	0.970874	0	100	3.8835	7.87402	n.d.	0.59366	0.0518732	0.0259366	0.0115274	0	0.0518732	0.224784	0.0172911	0.0201729	0.00288184	0	1
Nyemo	Nyemo	#1	63-250	n.d.	n.d.	n.d.	Area	S.Andò	3.74977	3.6949	0	0	0.49505	9.40594	0	9.40594	0	0	0	0	0	0	0	75.2475	2.9703	0	2.47525	0	100	0.49505	1.34228	n.d.	0.874459	0.012987	0	0	0	0.103896	0	0	0	0.004329	0.004329	1
Nyemo	Luowa	S4678	32-500	0.0386769	0.790628	0.170696	Point	M.Limonta	10.7852	7.82018	2.8436	0.473934	0	5.6872	5.21327	20.8531	0.473934	1.89573	0.947867	0	0	0	1.89573	55.9242	2.8436	0.473934	0.473934	0	100	3.31754	9.25926	66.6667	0.584488	0.202216	0.0110803	0.00277008	0.00554017	0.0166205	0.127424	0.00277008	0.0470914	0	0	1
Yarlung	Daga	S4677	32-500	0.0147676	0.863834	0.121399	Point	M.Limonta	8.21479	7.0363	0.492611	0.492611	0.492611	2.46305	1.47783	12.3153	0.492611	4.92611	3.94089	0	0	0	0	67.9803	3.94089	0	0.985222	0	100	1.47783	10.1781	0	0.611446	0.0722892	0.0271084	0	0.00301205	0.063253	0.189759	0.0150602	0.0180723	0	0	1
Yarlung	Jiazhulinzhen	S4664	32-500	0.0084805	0.985662	0.00585767	Point	M.Limonta	4.23031	2.9641	3.39806	1.45631	0.485437	1.94175	2.42718	9.2233	0.970874	8.25243	0	1.94175	0	0	0	66.5049	2.91262	0	0.485437	0	100	5.33981	13.9949	50	0.535065	0.161039	0.0467532	0.0103896	0.0103896	0.0155844	0.197403	0.012987	0.0025974	0	0.00779221	1
Yarlung	Gonggar	#2	63-250	n.d.	n.d.	n.d.	Area	S.Andò	2.53032	2.46035	2.36967	1.4218	0.473934	0.947867	0.947867	20.8531	0	2.8436	1.4218	0	0	0.947867	0	59.2417	5.6872	2.36967	0.473934	0	100	4.2654	6.50407	20	0.787313	0.0223881	0	0	0	0.186567	0	0.00373134	0	0	0	1
Yarlung	Gonggar	TSA-3	32-500	0.0148254	0.984604	0.000570207	Area	S.Andò	3.27138	2.79671	0.917431	1.37615	0	4.12844	5.04587	26.1468	0	3.66972	8.7156	0	0.458716	0.458716	0.458716	40.367	7.33945	0	0.458716	0.458716	100	2.29358	3.50877	9.09091	0.642254	0.0760563	0	0	0	0.104225	0	0.0676056	0.0591549	0.0112676	0.0394366	1
Yarlung	Gonggar	16A064	32-500	0.030853	0.8205	0.148647	Point	W.Liang	1.1034	0.816432	3.9604	2.9703	1.48515	4.9505	3.46535	31.1881	0	5.44554	0	0	0	0	0	39.1089	6.43564	0	0.49505	0.49505	100	8.41584	2.63158	n.d.	0.419087	0.118257	0.00414938	0.0248963	0	0.0352697	0.350622	0.033195	0.00207469	0	0.0124481	1
LADAKH RIVERS
Nyoma	Nyoma	S4421	32-355	0.0170008	0.466252	0.516747	Point	M.Limonta	3.24435	3.02654	0.757576	1.13636	0.757576	2.27273	4.16667	6.81818	0	0.757576	0.378788	0	0	0	0	75	5.68182	0	1.51515	0.757576	100	2.65152	14.5614	n.d.	0.639225	0.0290557	0	0.00726392	0.00968523	0.0145278	0.094431	0.094431	0.0968523	0	0.0145278	1
Nogo	Nogo	S4422	32-500	0.02448	0.393552	0.581968	Point	W.Liang	1.81629	1.76912	0	0.888889	0	0.888889	1.77778	7.55556	0	0	0	0	0	0	0	87.5556	1.33333	0	0	0	100	0.888889	6.38723	n.d.	0.646552	0.00862069	0.00287356	0.00574713	0	0.0689655	0.16092	0.0287356	0.0632184	0.00287356	0.0114943	1
Chumathang	Chumathang	S4423	32-355	0.00278552	0.536457	0.460757	Point	M.Limonta	14.9534	13.5578	0.490196	0.980392	0	3.43137	2.45098	9.80392	0	1.47059	0	0	0	0	0	77.451	3.92157	0	0	0	100	1.47059	5.34188	n.d.	0.752768	0.0516605	0	0.00369004	0.0221402	0.00738007	0.0738007	0.0627306	0.0110701	0	0.0147601	1
Ligchi	Ligchi	S4424	32-500	0.0140637	0.747697	0.238239	Point	W.Liang	6.76935	6.61337	0.471698	0.471698	0	1.88679	1.88679	8.01887	0	0	0	0	0	0	0	87.2642	0	0	0	0	100	0.943396	5.87002	n.d.	0.8	0.0188679	0	0	0	0.0113208	0.0377358	0.0188679	0.113208	0	0	1
Igoo	Igoo	S4425	32-355	0.00529139	0.538852	0.455857	Point	M.Limonta	4.6577	4.27661	1.48515	0.49505	0	7.42574	4.9505	6.43564	0	0	0	0	0	0	0	79.2079	0	0	0	0	100	1.9802	3.95833	n.d.	0.532982	0.0395778	0.00263852	0.00263852	0.00263852	0.00527704	0.0237467	0.0105541	0.37467	0	0.00527704	1
Stagmo	Stagmo	S4426	32-500	0.0136076	0.578644	0.407748	Point	W.Liang	12.6096	12.0364	0.47619	0	0	2.85714	0.952381	1.90476	0	0.47619	0	0	0	0	0	90	3.33333	0	0	0	100	0.47619	0	n.d.	0.792453	0.0377358	0	0	0	0.0377358	0.0264151	0.00754717	0.0943396	0	0.00377358	1
Leh	Leh	S4211	32-500	0.0368491	0.739067	0.224084	Point	W.Liang	5.83156	5.18083	0.483092	0.483092	0	2.89855	2.41546	14.4928	0	0.483092	0	0	0	0	0.483092	75.3623	1.93237	0	0.966184	0	100	0.966184	5.2381	n.d.	0.638889	0.0679012	0.00925926	0.00308642	0	0.0833333	0.0864198	0.0154321	0.0833333	0	0.0123457	1
Phyang	Phyang	S4427	32-355	0.00647595	0.626092	0.367432	Point	M.Limonta	20.1168	12.3238	3.92157	1.47059	0	5.88235	1.96078	4.41176	0	0.490196	0	0	0	0	0	69.1176	6.86275	0.490196	5.39216	0	100	5.39216	14.0351	n.d.	0.534031	0.329843	0	0.0026178	0.0052356	0.0157068	0.0497382	0.0157068	0.0418848	0	0.0052356	1
Humla	Humla	S4428	32-500	0.0234861	0.683399	0.293115	Point	W.Liang	16.5757	10.7742	2.40385	0	0	4.80769	6.25	3.84615	0	0.480769	0	0	0	0	0	82.2115	0	0	0	0	100	2.40385	0.406504	n.d.	0.507317	0.253659	0.0097561	0.0097561	0	0.00731707	0.0878049	0.0121951	0.102439	0	0.0097561	1
Basgo	Basgò B 3323	S1680	63-250	n.d.	n.d.	n.d.	Area	S.Andò	18.8341	12.8282	0.909091	0.454545	0	2.27273	0.909091	6.36364	0	0.909091	0	0	0	0	0	83.1818	3.18182	0	1.81818	0	100	1.36364	16.3904	n.d.	0.621469	0.29096	0	0	0	0	0.079096	0	0.00564972	0	0.00282486	1
Nurla	Nurla	S4429	32-500	0.0282607	0.786558	0.185182	Point	W.Liang	10.08	9.85596	0	0.454545	0	0.454545	0.454545	2.27273	0	0	0	0	0	0	0	79.5455	10.4545	0	5	1.36364	100	0.454545	3.37553	n.d.	0.869565	0.0197628	0	0	0	0.00790514	0.0434783	0.0197628	0.0395257	0	0	1
Domkar	Domkar	S4430	32-500	0.0142042	0.472322	0.513474	Point	W.Liang	9.67544	8.14573	0.469484	1.40845	0	2.34742	0.469484	7.04225	0	0.469484	0	0	0	0	0	86.385	0.469484	0	0.938967	0	100	1.87793	0.784314	n.d.	0.659443	0.123839	0	0	0	0.0371517	0.0959752	0.0371517	0.0402477	0	0.00619195	1
Skyur	Skurbuchan	S4431	32-355	0	0.265542	0.734458	Point	M.Limonta	12.8533	11.568	0	0.483092	0	6.28019	0.966184	2.41546	0	0	0	0	0	0	0	88.8889	0.966184	0	0	0	100	0.483092	9.89011	n.d.	0.772388	0.0634328	0.011194	0	0.011194	0.0223881	0.0597015	0.0186567	0.0298507	0.00373134	0.00746269	1
Hanu Thang	Hanu Thang	S4432	32-500	0.0195927	0.599319	0.381089	Point	W.Liang	11.901	11.1288	0	0.408163	0	2.44898	2.04082	11.0204	0	1.22449	0	0	0	0	0.816327	75.9184	3.67347	0	0	2.44898	100	0.408163	1.43149	n.d.	0.751534	0.0429448	0	0.00920245	0	0.00306748	0.0429448	0.00613497	0.131902	0	0.0122699	1

## Sheet: Table A4 Zrn age
Table A4
									Isotopic age (Ma)
Grain n°	207Pb	± 1s	207Pb	± 1s	206Pb	± 1s	208Pb	± 1s	207Pb	± 1s	207Pb	± 1s	206Pb	± 1s	208Pb	± 1s	Age	± 1s	Disc%	error
	206Pb		235U		238U		232Th		206Pb		235U		238U		232Th
HU4676-110	0.0474014	0.00526987	0.00760613	0.000626844	0.00116504	4.23156e-05	0.00045328	2.83098e-05	77.87	244.41	7.69391	0.631704	7.50593	0.272497	9.15972	0.571944	7.50593	0.272497	2.50442	0.0363042
HU4676-23	0.0617098	0.0134402	0.0185955	0.0030536	0.00292865	0.000141434	0.00110809	7.36485e-05	664.83	474.957	18.7081	3.04399	18.8517	0.909138	22.3846	1.48695	18.8517	0.909138	-0.761601	0.0482258
HU4676-113	0.0464747	0.00262314	0.0206291	0.00110684	0.00324388	9.03718e-05	0.00130815	6.70745e-05	20.47	133.32	20.7333	1.10124	20.8776	0.5808	26.4233	1.35395	20.8776	0.5808	-0.691089	0.0278193
HU4676-16	0.0599873	0.00851496	0.0219151	0.00308905	0.00345331	0.000193374	0.000845433	5.66828e-05	611.13	311.077	22.0119	3.06934	22.2231	1.24234	17.0809	1.14472	22.2231	1.24234	n.d.	0.0559029
HU4676-78	0.0479569	0.00557117	0.0283045	0.00251917	0.00437515	0.000165536	0.00139864	0.000132104	98.24	251.815	28.3407	2.48759	28.1425	1.06257	28.2499	2.66639	28.1425	1.06257	0.704253	0.0377569
HU4676-109	0.0470074	0.00223506	0.0334231	0.0014731	0.00526435	0.000148396	0.0013998	4.81155e-05	55.65	111.1	33.3824	1.44756	33.8472	0.951787	28.2733	0.971162	33.8472	0.951787	-1.37306	0.0281201
HU4676-31	0.04665	0.00653349	0.0349496	0.00386972	0.00528402	0.000216855	0.00205962	0.000216118	31.58	312.92	34.8812	3.79663	33.9733	1.39071	41.5866	4.35924	33.9733	1.39071	2.67228	0.0409353
HU4676-104	0.0480692	0.00293265	0.0384871	0.00236841	0.00598949	0.000203015	0.00202874	8.93717e-05	101.94	140.72	38.3459	2.31587	38.4956	1.30109	40.9637	1.80274	38.4956	1.30109	-0.388818	0.0337985
HU4676-49	0.04657	0.00237126	0.0396921	0.00197311	0.00616613	0.000208374	0.00291507	0.000111253	33.43	112.95	39.5234	1.92716	39.6274	1.33521	58.8343	2.24214	39.6274	1.33521	n.d.	0.033694
HU4676-25	0.0503661	0.00447661	0.04603	0.00382156	0.00644189	0.000215148	0.00207103	8.90085e-05	213.035	192.57	45.6943	3.70973	41.3939	1.37824	41.8168	1.79534	41.3939	1.37824	10.3889	0.0332956
HU4676-33	0.0475045	0.00198093	0.0423028	0.00180301	0.00648655	0.000178536	0.00252347	0.000362976	76.02	96.285	42.0699	1.75668	41.68	1.14372	50.9407	7.31809	41.68	1.14372	0.935479	0.0274406
HU4676-54	0.0605	0.01	0.0451	0.0044	0.0065	0.0004	0.0023	0.0001	633	363	44.8	4.3	42	2.3	47	2.5	42	2.3	6.73983	0.055
HU4676-14	0.0476714	0.00231868	0.0434111	0.00204525	0.00660676	0.00018333	0.00240877	8.55515e-05	83.425	111.1	43.149	1.99052	42.4498	1.17429	48.6281	1.72503	42.4498	1.17429	1.647	0.027663
HU4676-05	0.0483869	0.00290624	0.0439999	0.00250716	0.0067601	0.000194787	0.00205638	7.36402e-05	116.755	137.015	43.7217	2.43862	43.4317	1.24747	41.5214	1.48538	43.4317	1.24747	0.66768	0.0287224
HU4676-40	0.057289	0.0111254	0.0439018	0.00394682	0.00684317	0.000335856	0.00273309	0.000325686	501.89	437.758	43.6264	3.83911	43.9637	2.15048	55.1665	6.56489	43.9637	2.15048	-0.767206	0.048915
HU4676-103	0.0467114	0.00201462	0.0433781	0.00175174	0.00688095	0.000182475	0.00182301	6.53122e-05	35.28	164.795	43.1169	1.70499	44.2055	1.16852	36.8135	1.3177	44.2055	1.16852	-2.46272	0.0264337
HU4676-15	0.0507174	0.00531971	0.0471414	0.00460772	0.00690586	0.000248618	0.00219779	0.000114379	227.845	225.905	46.7725	4.46808	44.365	1.59188	44.3735	2.30679	44.365	1.59188	5.42669	0.0358815
HU4676-32	0.0477455	0.00450307	0.0453594	0.00368691	0.0069985	0.000235413	0.00261088	0.000328458	87.13	207.375	45.0432	3.58132	44.9581	1.50722	52.7029	6.62157	44.9581	1.50722	0.189261	0.033525
HU4676-34	0.0475837	0.00223219	0.0458037	0.00207642	0.00700125	0.000192783	0.00297075	0.000494071	79.72	107.4	45.4746	2.01626	44.9757	1.23436	59.9565	9.9567	44.9757	1.23436	1.10933	0.027445
HU4676-55	0.0497076	0.00465613	0.0473863	0.00434791	0.00703662	0.00025042	0.00240603	0.000126072	188.97	198.12	47.01	4.21518	45.2021	1.60322	48.5728	2.54208	45.2021	1.60322	3.99958	0.0354678
HU4676-46	0.0500309	0.00375322	0.0479259	0.00333234	0.00703948	0.000217431	0.00252009	0.000120196	198.23	174.052	47.533	3.22902	45.2204	1.39207	50.8726	2.42332	45.2204	1.39207	5.11407	0.0307841
HU4676-95	0.0482399	0.00642101	0.0464795	0.00457152	0.00711034	0.000285391	0.00214261	0.000147813	109.35	288.85	46.1305	4.43579	45.674	1.82692	43.2606	2.98125	45.674	1.82692	0.999523	0.0399992
HU4676-35	0.0495455	0.00617387	0.0451356	0.00495762	0.00714493	0.000263372	0.00340026	0.000643961	172.305	270.335	44.8258	4.81658	45.8954	1.68595	68.6103	12.9718	45.8954	1.68595	-2.33059	0.0367345
HU4676-58	0.0461169	0.00405571	0.045732	0.00370682	0.00716247	0.000225573	0.00237292	0.000119852	400.05	-188.865	45.405	3.59938	46.0077	1.44401	47.9051	2.41674	46.0077	1.44401	-1.31	0.0313863
HU4676-27	0.0501216	0.00414869	0.0513177	0.00369341	0.00718472	0.000222668	0.00227373	9.97118e-05	211.185	172.2	50.8142	3.56734	46.1501	1.42539	45.905	2.01083	46.1501	1.42539	10.1065	0.0308859
HU4676-20	0.0520591	0.00669843	0.0468456	0.00471898	0.00720652	0.000255879	0.00216638	0.000103484	287.1	279.6	46.4857	4.57726	46.2896	1.63789	43.74	2.08711	46.2896	1.63789	0.423537	0.0353836
HU4676-63	0.0494287	0.00530774	0.0472557	0.00437258	0.00721781	0.000254051	0.0021546	0.000102853	168.6	298.11	46.8834	4.23962	46.3619	1.62618	43.5024	2.07442	46.3619	1.62618	1.12492	0.0350757
HU4676-82	0.0469494	0.00318247	0.0464341	0.00292306	0.00725699	0.000211762	0.00249461	0.000102029	55.65	155.535	46.0865	2.8365	46.6126	1.3555	50.3589	2.0571	46.6126	1.3555	-1.12881	0.0290802
HU4676-81	0.047529	0.00376854	0.047111	0.00355598	0.0072827	0.000220663	0.00224044	8.9316e-05	76.02	177.75	46.7431	3.44838	46.7772	1.41243	45.2336	1.80124	46.7772	1.41243	-0.0728033	0.0301948
HU4676-115	0.0505894	0.00280746	0.0507957	0.00272846	0.00728509	0.00019978	0.00260768	0.000114684	220.44	129.61	50.3099	2.63674	46.7925	1.2788	52.6384	2.31199	46.7925	1.2788	7.51699	0.0273292
HU4676-09	0.0499098	0.00499646	0.0469754	0.00396372	0.007314	0.00024221	0.00234057	0.000106539	190.82	218.49	46.6116	3.84425	46.9775	1.55025	47.2529	2.14837	46.9775	1.55025	-0.77886	0.0329999
HU4676-68	0.0493605	0.00738048	0.0464785	0.00649571	0.00731546	0.00025109	0.00227506	0.000131726	164.9	314.77	46.1296	6.30278	46.9868	1.60708	45.9319	2.65643	46.9868	1.60708	-1.8244	0.0342027
HU4676-47	0.0506434	0.0071864	0.0470732	0.00427723	0.00732645	0.000332537	0.00229545	0.000122403	233.4	290.71	46.7065	4.1479	47.0572	2.12823	46.343	2.46837	47.0572	2.12823	-0.745309	0.0452265
HU4676-99	0.0494159	0.0067026	0.0465682	0.00533127	0.00733916	0.00027897	0.00257728	0.000148156	168.6	288.85	46.2166	5.17251	47.1385	1.78544	52.0256	2.98687	47.1385	1.78544	-1.95569	0.0378764
HU4676-111	0.0474223	0.00352956	0.0475753	0.00345635	0.0073456	0.000236269	0.00228122	8.75811e-05	77.87	161.085	47.1933	3.35029	47.1797	1.5122	46.0561	1.76618	47.1797	1.5122	0.0287195	0.0320518
HU4676-73	0.0478988	0.00519203	0.047526	0.004361	0.00739976	0.000249987	0.00232722	0.000112045	94.535	237.005	47.1454	4.2273	47.5263	1.59989	46.9837	2.25943	47.5263	1.59989	-0.801371	0.0336631
HU4676-74	0.0483551	0.0061504	0.047959	0.00385634	0.00740685	0.000269917	0.00230015	0.000146459	116.755	274.035	47.5651	3.73661	47.5717	1.72739	46.4377	2.95347	47.5717	1.72739	-0.0137796	0.0363114
HU4676-22	0.0465632	0.00306486	0.0474075	0.00300899	0.00741656	0.000223015	0.00223643	8.52735e-05	33.43	142.58	47.0305	2.91717	47.6338	1.42729	45.1528	1.71972	47.6338	1.42729	n.d.	0.0299639
HU4676-38	0.0511773	0.00428496	0.0526858	0.00385181	0.00743401	0.000232291	0.0028623	0.000425026	255.62	194.42	52.1346	3.71549	47.7455	1.48662	57.7708	8.56619	47.7455	1.48662	9.19284	0.0311363
HU4676-65	0.0466855	0.00273737	0.048553	0.00278912	0.00746668	0.000218689	0.00264364	0.000106855	31.58	137.02	48.1405	2.70109	47.9545	1.39955	53.3634	2.15408	47.9545	1.39955	0.387813	0.0291849
HU4676-08	0.05433	0.00844672	0.0486797	0.00480328	0.0074872	0.00028425	0.00223072	0.000111838	383.385	318.475	48.2631	4.65089	48.0858	1.81896	45.0375	2.25547	48.0858	1.81896	0.36877	0.0378275
HU4676-87	0.0470078	0.00336885	0.0489763	0.00333695	0.00752236	0.000217775	0.00227351	8.5233e-05	55.65	157.385	48.5503	3.23025	48.3108	1.39363	45.9005	1.71884	48.3108	1.39363	0.495745	0.0288472
HU4676-92	0.0601034	0.00885244	0.0523487	0.00544637	0.00752461	0.000329504	0.00241565	0.000149057	605.575	322.19	51.8094	5.25517	48.3252	2.10842	48.7667	3.00551	48.3252	2.10842	7.21003	0.0436298
HU4676-02	0.0505489	0.00511695	0.0492909	0.00435467	0.00753304	0.000268586	0.00230288	0.000114104	220.44	218.495	48.8547	4.21408	48.3791	1.71867	46.4927	2.30099	48.3791	1.71867	0.983178	0.0355251
HU4676-89	0.0477541	0.00387977	0.0479514	0.00327851	0.00754905	0.000227256	0.00246769	0.000104727	87.13	246.26	47.5577	3.17678	48.4815	1.45424	49.8161	2.11156	48.4815	1.45424	-1.90546	0.0299958
HU4676-98	0.0564703	0.0061801	0.0538204	0.00475209	0.00755318	0.000287062	0.00226546	0.000125697	472.265	244.415	53.2285	4.57891	48.5079	1.83683	45.7382	2.53486	48.5079	1.83683	9.73148	0.0378667
HU4676-91	0.0472939	0.00347025	0.0490605	0.00336534	0.00757132	0.000224346	0.00247854	0.000114973	64.91	166.64	48.6318	3.25748	48.624	1.4356	50.0348	2.31811	48.624	1.4356	0.0159945	0.0295245
HU4676-72	0.0468648	0.00955334	0.0494103	0.00814396	0.00757664	0.000393736	0.00275326	0.000260445	42.69	435.13	48.9703	7.87996	48.658	2.51923	55.5731	5.24971	48.658	2.51923	n.d.	0.0517743
HU4676-04	0.0484794	0.00368338	0.0488541	0.00311187	0.00761051	0.000233604	0.00235766	0.000102852	124.16	175.9	48.432	3.01274	48.8748	1.49477	47.5975	2.07399	48.8748	1.49477	-0.905839	0.0305836
HU4676-11	0.0487821	0.00446728	0.0490674	0.00356918	0.00763447	0.000249465	0.00241616	0.000103328	200.075	138.87	48.6384	3.45473	49.0281	1.59619	48.7771	2.08345	49.0281	1.59619	-0.794719	0.0325566
HU4676-85	0.048465	0.00462083	0.0493139	0.00415758	0.00764052	0.0002518	0.00226736	0.000110393	120.46	211.08	48.877	4.02328	49.0668	1.61112	45.7766	2.22624	49.0668	1.61112	-0.386825	0.0328352
HU4676-93	0.0505195	0.00462446	0.0520126	0.00416879	0.00769319	0.00025492	0.00272148	0.000113593	220.44	196.275	51.4851	4.02379	49.4037	1.63099	54.9325	2.28973	49.4037	1.63099	4.21303	0.0330135
HU4676-52	0.0484611	0.00396792	0.0506746	0.00382481	0.00780923	0.000273942	0.00243329	9.20238e-05	120.46	185.155	50.1929	3.6965	50.146	1.75247	49.1225	1.85549	50.146	1.75247	0.0934844	0.0349473
HU4676-53	0.0492114	0.00363276	0.053312	0.00388014	0.00787768	0.00023421	0.00266497	0.000107744	166.75	153.68	52.7385	3.74059	50.5838	1.49826	53.7933	2.17197	50.5838	1.49826	4.25963	0.0296194
HU4676-107	0.0534784	0.00632591	0.0547623	0.00449625	0.00789768	0.000280343	0.0023747	0.000139162	350.055	270.335	54.1356	4.32854	50.7118	1.79326	47.9412	2.8061	50.7118	1.79326	6.75152	0.0353617
HU4676-120	0.048018	0.00366936	0.0514186	0.00368241	0.00789981	0.00023517	0.00265454	0.000113517	101.94	170.345	50.9116	3.55637	50.7254	1.50437	53.5831	2.28835	50.7254	1.50437	0.36717	0.0296571
HU4676-59	0.0526116	0.00666261	0.0532295	0.00489473	0.00798065	0.000337438	0.00273785	0.000172225	322.28	253.68	52.6589	4.71898	51.2424	2.15822	55.2624	3.47155	51.2424	2.15822	2.76432	0.0421179
HU4676-97	0.0592251	0.00789562	0.0642145	0.00793496	0.00799279	0.000291016	0.00334281	0.000192049	575.96	292.56	63.1944	7.57099	51.32	1.86134	67.4529	3.86881	51.32	1.86134	23.1378	0.0362693
HU4676-101	0.0476675	0.00356828	0.0521396	0.00333176	0.00802187	0.00024449	0.00262832	0.000114233	83.425	166.64	51.6077	3.21555	51.506	1.56379	53.0546	2.30285	51.506	1.56379	0.197538	0.0303613
HU4676-75	0.0518939	0.00605588	0.0543934	0.00453503	0.00809075	0.000279976	0.00264046	0.000173031	279.69	248.125	53.7804	4.3674	51.9464	1.79058	53.2993	3.48812	51.9464	1.79058	3.53041	0.0344697
HU4676-07	0.050595	0.00422465	0.0552459	0.00387397	0.00827692	0.000254641	0.00329781	0.00014373	233.4	194.42	54.601	3.72782	53.1368	1.6283	66.5464	2.89556	53.1368	1.6283	2.75553	0.0306436
HU4676-18	0.0626179	0.00724443	0.0733245	0.00736752	0.00845807	0.000309845	0.00337147	0.000210577	694.455	248.122	71.8493	6.96997	54.2949	1.98086	68.0303	4.24193	54.2949	1.98086	32.3316	0.0364833
HU4676-45	0.0467109	0.00195444	0.0566514	0.00239604	0.0085119	0.000232987	0.00320658	0.000156036	35.28	96.29	55.9525	2.30278	54.639	1.48955	64.7084	3.14376	54.639	1.48955	2.40394	0.0272617
HU4676-24	0.0487785	0.0047435	0.0541983	0.00446515	0.00854651	0.000281516	0.00261055	0.000134522	200.075	149.98	53.5925	4.3009	54.8603	1.79964	52.6963	2.7119	54.8603	1.79964	-2.31096	0.032804
HU4676-106	0.0529027	0.00400844	0.0592964	0.00396725	0.00864391	0.000262209	0.00271928	0.000152531	324.13	172.2	58.491	3.80299	55.4828	1.67609	54.8881	3.07463	55.4828	1.67609	5.42188	0.0302092
HU4676-57	0.0462329	0.00212535	0.0547994	0.00242615	0.0086513	0.000239735	0.00325127	0.000115128	9.36	107.395	54.1713	2.33578	55.53	1.53247	65.6088	2.31945	55.53	1.53247	-2.44672	0.0275971
HU4676-60	0.0509747	0.00704116	0.057472	0.00604892	0.00875608	0.000395754	0.00307703	0.000228528	238.955	292.565	56.7408	5.8083	56.1997	2.52923	62.0981	4.60489	56.1997	2.52923	n.d.	0.0450044
HU4676-39	0.0490998	0.00480277	0.0586677	0.00491578	0.00893482	0.000317598	0.00369727	0.000477844	153.79	214.78	57.8883	4.71496	57.3418	2.02948	74.5923	9.62272	57.3418	2.02948	0.953046	0.0353926
HU4676-50	0.0500447	0.00294783	0.0631532	0.00375312	0.0089833	0.000273546	0.00233199	9.03251e-05	198.23	137.018	62.1813	3.58473	57.6515	1.74797	47.0799	1.82142	57.6515	1.74797	7.85719	0.0303195
HU4676-76	0.0476306	0.00234123	0.0599525	0.00287164	0.00901338	0.000255493	0.00327125	0.000118412	79.72	114.805	59.1198	2.75119	57.8437	1.6326	66.0113	2.38558	57.8437	1.6326	2.20612	0.0282244
HU4676-67	0.0464438	0.00505503	0.0603363	0.00583288	0.00919046	0.000303082	0.00301893	0.000121905	20.47	244.41	59.4874	5.58574	58.9749	1.93626	60.9273	2.45656	58.9749	1.93626	n.d.	0.0328319
HU4676-56	0.0487347	0.0037722	0.0637969	0.00439336	0.009595	0.000296079	0.00310837	0.000119122	200.075	109.245	62.7958	4.19364	61.5585	1.8908	62.7296	2.40026	61.5585	1.8908	2.01	0.0307156
HU4676-61	0.0463388	0.00204277	0.0627867	0.00282644	0.00962618	0.000269049	0.00326707	0.000118205	16.765	99.99	61.8312	2.7007	61.7576	1.71819	65.9271	2.38141	61.7576	1.71819	0.119186	0.0278215
HU4676-66	0.0560469	0.00617913	0.0699818	0.00626123	0.00977658	0.000366915	0.00328696	0.000179719	453.75	248.113	68.6822	5.94191	62.7178	2.34263	66.3278	3.62062	62.7178	2.34263	9.5098	0.0373519
HU4676-30	0.0511475	0.00375062	0.0717841	0.0046959	0.0099658	0.00030906	0.00366729	0.000161414	255.62	165.72	70.391	4.44904	63.9257	1.97297	73.9885	3.25062	63.9257	1.97297	10.1138	0.0308635
HU4676-117	0.0464708	0.00551735	0.0640263	0.00680461	0.0102571	0.000338371	0.00310496	0.000144379	20.47	262.925	63.0148	6.49367	65.7847	2.15942	62.661	2.90918	65.7847	2.15942	-4.21056	0.0328256
HU4676-62	0.0496424	0.00462536	0.0707782	0.00595129	0.010347	0.000344841	0.00336463	0.000193577	188.97	194.415	69.4377	5.64361	66.3582	2.20052	67.8926	3.89951	66.3582	2.20052	4.64079	0.0331612
HU4676-13	0.0487358	0.00511112	0.0678481	0.00603062	0.010357	0.000349106	0.00330357	0.000136184	200.075	164.795	66.6553	5.73451	66.4219	2.2277	66.6624	2.74352	66.4219	2.2277	0.351515	0.0335387
HU4676-116	0.0502688	0.00511558	0.0706318	0.00639971	0.0108712	0.000365071	0.00357005	0.000209699	205.63	222.195	69.2988	6.06964	69.7023	2.32839	72.0303	4.22341	69.7023	2.32839	-0.57885	0.0334048
HU4676-84	0.0487953	0.00425488	0.0774079	0.0055314	0.0117108	0.000404631	0.00419085	0.000236095	200.075	131.465	75.705	5.21322	75.0539	2.57855	84.5294	4.75209	75.0539	2.57855	0.86743	0.0343559
HU4676-12	0.0495676	0.00212673	0.114646	0.00498797	0.0167636	0.000489821	0.00542612	0.000232419	176.01	97.2075	110.207	4.54439	107.169	3.10607	109.377	4.67235	107.169	3.10607	2.83436	0.0289829
HU4676-48	0.0482318	0.00161266	0.113853	0.00427328	0.0170429	0.000535722	0.00546463	0.000176261	109.35	77.77	109.484	3.89622	108.94	3.39613	110.152	3.54327	108.94	3.39613	0.499269	0.0311744
HU4676-100	0.0490961	0.00243788	0.115589	0.00551097	0.0172895	0.000486271	0.00583258	0.000295579	153.79	116.65	111.065	5.01652	110.503	3.08201	117.547	5.93966	110.503	3.08201	n.d.	0.0278908
HU4676-28	0.0465658	0.00247136	0.119878	0.00652961	0.0185984	0.000529194	0.0055344	0.000228111	33.43	116.655	114.961	5.92086	118.792	3.34973	111.554	4.58525	118.792	3.34973	-3.22453	0.0281983
HU4676-105	0.0505643	0.00318803	0.128295	0.00742218	0.0192204	0.000545926	0.00493989	0.000255968	220.44	141.647	122.564	6.67994	122.727	3.45354	99.6003	5.14826	122.727	3.45354	-0.13236	0.02814
HU4676-96	0.0491299	0.0032885	0.127072	0.00748569	0.0194014	0.000575869	0.00608213	0.000286009	153.79	148.12	121.463	6.74439	123.872	3.64225	122.561	5.74594	123.872	3.64225	-1.94415	0.0294034
HU4676-10	0.0504869	0.00293467	0.133902	0.00728846	0.0197902	0.000588369	0.00595786	0.000222606	216.74	135.165	127.598	6.52722	126.33	3.71989	120.064	4.47273	126.33	3.71989	1.00363	0.0294459
HU4676-21	0.0518495	0.00307579	0.166351	0.00896655	0.0231577	0.00065356	0.00862954	0.000384987	279.69	104.618	156.247	7.80668	147.582	4.11853	173.674	7.71487	147.582	4.11853	5.87164	0.0279068
HU4676-118	0.0485082	0.00211038	0.160891	0.00590749	0.0243872	0.000664351	0.00677624	0.000436054	124.16	108.317	151.483	5.16806	155.324	4.18157	136.501	8.7543	155.324	4.18157	-2.47284	0.0269216
HU4676-69	0.0537851	0.00313824	0.231219	0.012155	0.0310856	0.000895171	0.0093512	0.000358319	361.165	126.84	211.205	10.0253	197.339	5.59768	188.13	7.17533	197.339	5.59768	7.02637	0.0283658
HU4676-102	0.0506532	0.0028208	0.216203	0.01101	0.0314207	0.000879596	0.00933471	0.000361251	233.4	124.983	198.745	9.19302	199.434	5.49856	187.8	7.23416	199.434	5.49856	-0.345479	0.0275708
HU4676-114	0.0562673	0.00199754	0.568953	0.0208274	0.073121	0.00214963	0.0271385	0.000995076	461.155	77.77	457.337	13.4825	454.931	12.9155	541.219	19.5813	454.931	12.9155	0.528801	0.0283901
HU4676-94	0.0595984	0.00244288	0.611273	0.0250889	0.0743206	0.00226561	0.0250774	0.000841288	590.77	88.875	484.363	15.8138	462.133	13.597	500.618	16.5883	462.133	13.597	4.81009	0.0294222
HU4676-41	0.0554272	0.00197929	0.588564	0.0204344	0.0753256	0.00205389	0.0235556	0.000716949	427.825	79.6225	469.95	13.0652	468.161	12.3154	470.591	14.1576	468.161	12.3154	0.382084	0.0263059
HU4676-79	0.0595665	0.00273547	0.625733	0.0286653	0.0755909	0.00216159	0.024923	0.00085175	587.065	99.985	493.434	17.9066	469.752	12.9577	497.574	16.7971	469.752	12.9577	5.04155	0.0275842
HU4676-01	0.0552993	0.00251123	0.625195	0.0276571	0.0809728	0.00228311	0.0253392	0.000864252	433.38	101.84	493.098	17.2827	501.927	13.6181	505.781	17.0368	501.927	13.6181	-1.75888	0.0271316
HU4676-44	0.0563009	0.00236993	0.670172	0.0273414	0.0862283	0.00236325	0.0273236	0.000889411	464.86	92.585	520.817	16.626	533.192	14.0281	544.86	17.4989	533.192	14.0281	-2.3209	0.0263096
HU4676-83	0.0580982	0.00213231	0.757006	0.0277076	0.0938001	0.00253159	0.028958	0.00089618	600.025	81.4675	572.281	16.0171	577.972	14.9234	576.991	17.604	577.972	14.9234	-0.984676	0.0258203
HU4676-112	0.0635648	0.00246324	0.84796	0.0399298	0.0947068	0.00293391	0.0279652	0.000990658	727.785	82.245	623.529	21.944	583.314	17.2798	557.48	19.4787	583.314	17.2798	6.89423	0.0296235
HU4676-70	0.0662654	0.00321998	0.909421	0.0420249	0.100156	0.00334056	0.0140183	0.00093106	814.5	106.475	656.75	22.3523	615.321	19.577	281.374	18.5586	615.321	19.577	6.73295	0.0318159
HU4676-77	0.0632693	0.00208545	0.954151	0.032394	0.108651	0.0030049	0.0344796	0.00107052	716.675	65.735	680.262	16.8384	664.906	17.4761	685.164	20.9165	664.906	17.4761	2.30942	0.0262836
HU4676-119	0.0603737	0.00235158	0.923285	0.0351644	0.111955	0.00297234	0.0327323	0.00108767	616.685	83.32	664.096	18.5702	684.093	17.2357	650.996	21.2874	684.093	17.2357	-2.92316	0.025195
HU4676-17	0.0693305	0.00325307	1.33748	0.0729723	0.138005	0.00452104	0.0482157	0.00209793	909.26	100.925	862.136	31.704	833.373	25.6141	951.782	40.4534	833.373	25.6141	n.d.	0.0307354
HU4676-43	0.0767934	0.00238945	1.92509	0.0635191	0.180482	0.00516054	0.058947	0.0018354	1116.66	61.5725	1089.84	22.0618	1069.61	28.1868	1157.66	35.0325	1116.66	61.5725	1.89104	0.0551396
HU4676-80	0.0857919	0.00303596	2.5871	0.0923581	0.217152	0.00591985	0.0659958	0.00201049	1400	73.15	1296.99	26.1583	1266.81	31.3608	1291.75	38.1207	1400	73.15	2.38251	0.05225
HU4676-64	0.0969357	0.00354518	3.77162	0.134594	0.280117	0.00749768	0.0835033	0.00270465	1565.74	68.515	1586.73	28.6613	1591.95	37.7666	1621.01	50.454	1565.74	68.515	-0.328237	0.0437587
HU4676-19	0.109101	0.00399743	4.93409	0.174425	0.331633	0.00908564	0.0964587	0.00316969	1784.26	66.515	1808.11	29.8713	1846.29	43.9947	1861.26	58.4304	1784.26	66.515	-2.06817	0.0372788

## Sheet: Table A5 Zrn Hf
Table A5
						176 Lu decay constant =1.867x10-11 (Soederlund et al. 2004)
Grain n°	Age	176Hf	± 1s	176Lu	176Yb	176Hf/177Hf	e Hf (t)	± 1s	T(DM)	T(DM)	Hf	Hf
	(Ma)	177Hf		177Hf	177Hf	initial			(Ga)	crustal	Chur (t)	DM (t)
HU4676-02	48.3791	0.282873	0.000543988	0.00108798	0.0443887	0.282872	4.60039	19.0396	0.538395	0.828313	0.282742	0.283215
HU4676-04	48.8748	0.282779	0.000181539	0.000363077	0.00983121	0.282778	1.2908	6.35385	0.659837	1.03938	0.282742	0.283215
HU4676-05	43.4317	0.282949	0.000815406	0.00163081	0.0523241	0.282948	7.16382	28.5392	0.436763	0.660694	0.282745	0.283219
HU4676-07	53.1368	0.282581	0.000798644	0.00159729	0.0658755	0.28258	-5.63793	27.9525	0.964581	1.48112	0.282739	0.283212
HU4676-08	48.0858	0.282904	0.000599745	0.00119949	0.0473337	0.282903	5.69248	20.9911	0.495576	0.758381	0.282742	0.283216
HU4676-09	46.9775	0.282941	0.000490561	0.000981122	0.0369974	0.28294	6.96252	17.1696	0.441073	0.676342	0.282743	0.283216
HU4676-10	126.33	0.282625	0.000626987	0.00125397	0.0440869	0.282622	-2.54139	21.9445	0.894103	1.34288	0.282694	0.283159
HU4676-11	49.0281	0.282822	0.000577883	0.00115577	0.0403382	0.282821	2.81407	20.2259	0.611694	0.942636	0.282742	0.283215
HU4676-13	66.4219	0.28254	0.000483219	0.000966438	0.039287	0.282539	-6.78123	16.9127	1.006	1.56352	0.282731	0.283202
HU4676-14	42.4498	0.282896	0.000739075	0.00147815	0.0572772	0.282895	5.28483	25.8676	0.510699	0.780006	0.282746	0.28322
HU4676-15	44.365	0.282968	0.000633778	0.00126756	0.0478769	0.282967	7.88157	22.1822	0.404682	0.615484	0.282744	0.283218
HU4676-16	22.2231	0.282917	0.000433823	0.000867646	0.0275983	0.282917	5.59859	15.1838	0.473283	0.744169	0.282758	0.283234
HU4676-18	54.2949	0.283119	0.00050105	0.0010021	0.0340409	0.283118	13.418	17.5367	0.187687	0.26754	0.282738	0.283211
HU4676-20	46.2896	0.282913	0.0006816	0.0013632	0.0502944	0.282912	5.9642	23.856	0.485004	0.739621	0.282743	0.283217
HU4676-21	147.582	0.282237	0.000294065	0.000588129	0.0239611	0.282235	-15.7397	10.2923	1.41594	2.18794	0.28268	0.283144
HU4676-22	47.6338	0.282896	0.000534755	0.00106951	0.0366104	0.282895	5.38347	18.7164	0.506058	0.77776	0.282742	0.283216
HU4676-23	18.8517	0.283029	0.000231782	0.000463563	0.0162898	0.283029	9.48842	8.11236	0.311443	0.492569	0.28276	0.283236
HU4676-24	54.8603	0.28256	0.000605899	0.0012118	0.0480829	0.282559	-6.34017	21.2064	0.984752	1.5267	0.282738	0.283211
HU4676-25	41.3939	0.28294	0.000416299	0.000832599	0.0324824	0.282939	6.82213	14.5705	0.440355	0.680959	0.282746	0.28322
HU4676-27	46.1501	0.28298	0.00103224	0.00206447	0.0681395	0.282978	8.30769	36.1283	0.396451	0.589585	0.282743	0.283217
HU4676-28	118.792	0.282509	0.000299129	0.000598259	0.0216929	0.282508	-6.73384	10.4695	1.03943	1.60152	0.282698	0.283165
HU4676-30	63.9257	0.282553	0.000554868	0.00110974	0.0425126	0.282552	-6.39524	19.4204	0.992087	1.53727	0.282732	0.283204
HU4676-31	33.9733	0.282911	0.000176792	0.000353585	0.0121355	0.28291	5.64122	6.18773	0.475598	0.750628	0.282751	0.283226
HU4676-32	44.9581	0.282873	0.000388032	0.000776065	0.0296389	0.282873	4.55061	13.5811	0.533412	0.828814	0.282744	0.283218
HU4676-35	45.8954	0.282903	0.000476179	0.000952357	0.0361556	0.282902	5.60743	16.6663	0.494171	0.762102	0.282744	0.283217
HU4676-39	57.3418	0.283111	0.000577689	0.00115538	0.0432549	0.28311	13.2	20.2191	0.199687	0.28397	0.282736	0.283209
HU4676-40	43.9637	0.282955	0.00103817	0.00207634	0.0773346	0.282954	7.39052	36.336	0.432648	0.646604	0.282745	0.283218
HU4676-45	54.639	0.28262	0.00157866	0.00315732	0.105917	0.282617	-4.28535	55.2531	0.948757	1.39699	0.282738	0.283211
HU4676-46	45.2204	0.282829	0.000628973	0.00125795	0.0462494	0.282828	2.97048	22.0141	0.603688	0.929704	0.282744	0.283218
HU4676-47	47.0572	0.282786	0.000375221	0.000750443	0.0307743	0.282785	1.50914	13.1327	0.655863	1.02409	0.282743	0.283216
HU4676-48	108.94	0.28239	0.0011855	0.00237099	0.0960723	0.282385	-11.3077	41.4924	1.26412	1.88092	0.282704	0.283172
HU4676-49	39.6274	0.282523	0.000970842	0.00194168	0.0768186	0.282522	-7.97626	33.9795	1.05706	1.61769	0.282747	0.283222
HU4676-50	57.6515	0.282485	0.000834016	0.00166803	0.0644025	0.282483	-8.95505	29.1906	1.10427	1.69328	0.282736	0.283209
HU4676-53	50.5838	0.28294	0.000857555	0.00171511	0.0596502	0.282938	6.97761	30.0144	0.451385	0.678193	0.282741	0.283214
HU4676-54	42	0.282723	0.000340464	0.000680928	0.0256406	0.282722	-0.830145	11.9162	0.743145	1.16859	0.282746	0.28322
HU4676-55	45.2021	0.282953	0.000559903	0.00111981	0.0362167	0.282952	7.37128	19.5966	0.424545	0.648803	0.282744	0.283218
HU4676-56	61.5585	0.282457	0.000834286	0.00166857	0.0598269	0.282455	-9.8729	29.2	1.14462	1.75392	0.282734	0.283206
HU4676-57	55.53	0.282625	0.000733873	0.00146775	0.0603871	0.282624	-4.0335	25.6855	0.898776	1.38179	0.282738	0.28321
HU4676-58	46.0077	0.282896	0.000453894	0.000907789	0.0368668	0.282895	5.36458	15.8863	0.503455	0.777695	0.282743	0.283217
HU4676-59	51.2424	0.282961	0.000527499	0.001055	0.0352247	0.28296	7.79044	18.4624	0.41219	0.62669	0.28274	0.283213
HU4676-60	56.1997	0.282474	0.000339135	0.00067827	0.026616	0.282473	-9.33736	11.8697	1.09088	1.71613	0.282737	0.28321
HU4676-61	61.7576	0.282549	0.000894122	0.00178824	0.075497	0.282547	-6.61731	31.2943	1.01632	1.54955	0.282734	0.283206
HU4676-62	66.3582	0.28238	0.00106831	0.00213661	0.0837769	0.282377	-12.5154	37.3907	1.27035	1.92312	0.282731	0.283202
HU4676-63	46.3619	0.282828	0.0010619	0.0021238	0.0814692	0.282826	2.94138	37.1666	0.619115	0.932448	0.282743	0.283217
HU4676-66	62.7178	0.282533	0.000565571	0.00113114	0.0453161	0.282532	-7.12981	19.795	1.02089	1.58255	0.282733	0.283205
HU4676-68	46.9868	0.282834	0.000459595	0.00091919	0.0354455	0.282833	3.18047	16.0858	0.591782	0.917715	0.282743	0.283216
HU4676-69	197.339	0.28252	0.000397677	0.000795355	0.0259184	0.282517	-4.69889	13.9187	1.0304	1.5347	0.282649	0.283108
HU4676-72	48.658	0.282956	0.000219796	0.000439591	0.0149962	0.282955	7.55018	7.69284	0.413653	0.640052	0.282742	0.283215
HU4676-73	47.5263	0.282877	0.000512577	0.00102515	0.0359163	0.282876	4.73465	17.9402	0.531461	0.819082	0.282743	0.283216
HU4676-74	47.5717	0.282809	0.000723001	0.001446	0.0545734	0.282807	2.29061	25.305	0.636055	0.974804	0.282742	0.283216
HU4676-76	57.8437	0.282461	0.000742959	0.00148592	0.0574204	0.28246	-9.77992	26.0036	1.13246	1.74518	0.282736	0.283209
HU4676-78	28.1425	0.282616	0.000374541	0.000749082	0.0218662	0.282616	-4.91459	13.1089	0.894437	1.41596	0.282755	0.28323
HU4676-82	46.6126	0.282908	0.000924514	0.00184903	0.0644051	0.282906	5.77697	32.358	0.498773	0.751834	0.282743	0.283217
HU4676-89	48.4815	0.282926	0.000595799	0.0011916	0.0409925	0.282924	6.45646	20.853	0.465002	0.709876	0.282742	0.283215
HU4676-92	48.3252	0.282741	0.000894934	0.00178987	0.0648804	0.282739	-0.0934758	31.3227	0.739548	1.12683	0.282742	0.283215

## Sheet: Table A6 Ap trace
Table A6
Grain n°	Sr	Ti	Y	La	Ce	Pr	Nd	Sm	Eu	Gd	Tb	Dy	Ho	Er	Tm	Yb	Lu	Th	U	Zr	Pb
	ppm	ppm	ppm	ppm	ppm	ppm	ppm	ppm	ppm	ppm	ppm	ppm	ppm	ppm	ppm	ppm	ppm	ppm	ppm	ppm	ppm
S4676 01	445.85	104.69	129.33	1819.32	2256.63	153.89	448.99	47.84	18.05	36.35	3.88	20.11	4.32	10.89	1.41	10.88	2	107.03	28.97	1.74	2.78878
S4676 02	393.16	108.74	60.98	881.84	1023.72	66.75	195.23	23.1	5.53	16.24	1.75	9.55	1.85	4.93	0.627	4.83	1.006	37.48	28.45	<0.4	2.49757
S4676 03	473.71	111.01	198.78	1698.15	2476.4	187.93	555.04	68.5	17.71	49.01	5.92	31.34	6.67	17.45	2.37	17.69	3.14	151.04	37.59	1.45	3.39365
S4676 04	714.87	110.95	176.41	1445.65	2735.9	247.42	782.96	94.85	17.28	60.02	6.98	31.57	6.27	15.48	1.91	11.99	1.83	55.83	10.31	0.68	5.2262
S4676 05	528.89	108.23	174.79	488.57	1790.87	263.46	1095.89	167.33	21.79	78.85	7.51	29.52	4.63	11.05	1.52	10.48	1.65	21.69	4.83	<0.6	8.02707
S4676 06	577	98.83	164.48	523.75	1081.27	111.23	422.58	68.88	12.44	54.2	6.51	33.69	6.38	15.35	1.81	11.29	1.53	13.8	2.9	3.28	2.35972
S4676 07	325.85	104.92	104.26	1962.99	2530.87	163.94	427.8	41.38	16.21	28.53	2.94	14.79	3.08	8.7	1.33	10.04	2.31	76.84	18.15	1.02	4.48459
S4676 09	324.83	93.11	347.45	1314.35	3544.94	418.61	1542.38	226.01	23.45	125.78	13.04	59.39	11.31	27.36	3.55	21.93	3.07	111.17	15.29	<0.5	8.90172
S4676 10	230.42	114.95	491.51	919.37	2517.24	304.02	1209.78	204.2	36.17	148.14	18.57	93.6	18.65	45.2	5.65	38.18	6.19	40.72	13.86	1.17	3.85454
S4676 11	437.77	110.21	1038.14	154.11	755.5	130.21	716.1	213.37	60.45	209.04	29.9	168.13	33.55	86	11.95	79.75	12.98	64.65	95	0.9	5.14784
S4676 12	430.56	129.51	68.68	711.47	838.24	57.39	178.48	24.46	7.47	19.43	2.19	12.66	2.48	6.75	0.774	5.77	1	20.95	5.5	1.74	2.48746
S4676 13	577.01	123.82	181.06	742.01	1515.16	132.94	420.32	54.91	11.22	41.43	4.88	26.47	5.37	15.39	2.15	15.44	2.39	33.63	9.46	<0.5	5.13718
S4676 14	322.56	119.02	145.92	2753.92	3359.01	201.92	528.38	53.86	15.22	37.37	4.19	21.46	4.61	12.79	2	14.99	3.16	67.7	12.25	0.82	3.52697
S4676 15	655.16	116.05	323.31	332.77	1279.82	176.65	803.71	143.42	27.81	89.67	9.79	49.39	9.72	25.7	3.69	25.4	4.52	67.94	29.9	0.85	7.12539
S4676 16	302.42	114.45	203.84	787.43	1465.31	118.89	363.6	46.97	14.68	37.12	4.61	27.09	6.23	18.14	2.93	22.39	4.46	87.96	26.8	<0.6	3.17704
S4676 18	405.13	123.36	165.76	1230.61	1788.29	129.52	389.96	51.8	12.68	40.66	4.73	25.84	5.26	15.07	2.03	15.04	2.76	217.99	72.08	1.35	3.72606
S4676 19	449.81	115.91	57.08	856.55	922.86	52.89	149.09	16.53	5.48	13.57	1.68	8.79	1.89	4.86	0.689	5.18	1.05	122.94	52	0.74	2.53354
S4676 20	363.33	108.98	123.97	1304.28	1972.29	136	364.93	36.79	10.96	26.03	3.05	16.39	3.64	10.87	1.65	13.97	2.92	78.86	20.23	0.72	3.96116
S4676 21	429.33	120.48	79.45	1877.92	2023.4	124.56	336.27	33.8	12.17	23.14	2.35	12.45	2.76	6.89	0.89	6.87	1.41	62.46	17.11	1.03	3.84214
S4676 22	363.5	106.48	199.98	1141.91	1841.92	148.66	455.75	57.24	14.31	42.31	5.4	28.56	6.19	17.37	2.67	20.49	3.94	252.28	66.83	1.4	3.90314
S4676 23	203.21	119.09	611.77	912.13	3259.9	450.2	1762.34	292.82	28.37	168.83	18.95	92.07	17.35	43.76	6.17	41.71	7.14	85.98	14.78	0.53	9.63581
S4676 24	587.07	119.7	379.67	81.6	432.39	79.33	447.27	110.77	21.05	107.03	13.63	71.93	14.31	34.39	4.17	26.22	4.13	23.35	9.08	0.74	1.69819
S4676 25	288	116.41	422.05	951.38	3126.08	400.32	1548.48	237.53	32.35	136.33	14.38	67.66	12.36	32.3	4.29	30.71	5.06	139.94	27.7	0.78	7.423
S4676 26	224.79	118.44	47.87	1418.27	1363.9	67.03	159.57	14.66	7.33	11.51	1.07	6.03	1.4	3.92	0.584	5.53	1.5	55.41	32.66	<0.5	3.89401
S4676 27	548.2	139.25	364.2	2525.85	4351.38	362.09	1121.95	136.13	35.31	100.75	12.1	61.79	12.94	33.67	4.53	31.12	5.07	158.1	44.22	1.78	3.336
S4676 28	429.46	125.09	63.48	423.82	674.21	47.69	142.22	19.23	3.94	14.79	1.65	9.06	2.07	5.76	0.797	5.98	1.021	26.34	13.04	<0.4	2.65133
S4676 29	419.92	126.16	57.42	1125.51	1415.55	87.37	229.58	22.88	6.81	15.74	1.67	7.99	1.66	4.58	0.679	4.98	1.1	47.33	26.51	0.49	3.33969
S4676 30	444.55	102.89	80.1	1580.03	1926.65	123.8	332.12	31.74	9.92	21.69	2.22	11.93	2.53	7.18	1.04	8.02	1.57	60.82	11.57	0.54	6.80114
S4676 31	416.68	115.55	82.53	1540.44	1978.74	118.27	297.2	25.29	8.88	18.29	1.94	10.01	2.47	7.02	1	7.88	1.84	91.39	19.28	0.86	4.35611
S4676 33	385.06	112.27	103.88	1477.99	2009	140.28	415.07	45.76	9.16	31.23	3.38	17.14	3.41	8.97	1.24	8.91	1.63	57.5	13	<0.6	3.18786
S4676 34	301.96	114.7	53.15	930.16	999.61	63.69	196.83	25.07	4.13	18.77	1.97	9.47	2.03	4.96	0.656	4.52	0.869	21.78	14.82	1.67	3.67964
S4676 35	439.86	116.1	107.81	1322.17	1774.15	121.26	343.41	37.66	9.75	28.42	3.16	16.15	3.51	9.62	1.47	11.01	2.12	120.21	32.41	1.19	3.27818
S4676 36	508.47	116.25	36.79	564.56	668.24	41.38	113.8	12.2	3.75	9.3	1.03	5.21	1.04	3.43	0.379	3.35	0.697	54.02	15.38	0.64	1.80186
S4676 37	277.02	117.84	165.82	3139.69	3318.15	182.91	449.79	44.55	21	35.34	3.94	21.43	4.74	13.41	1.95	17.96	4.01	198.45	85.6	1.34	4.12265
S4676 38	304.02	120.71	301.7	2865.53	4414.18	309.7	845.76	88.62	24.11	67.41	7.69	43.02	9.48	28.84	4.34	34.45	6.97	348.02	93.14	2.35	4.38615
S4676 39	344.97	109.04	47.36	951.29	1117.05	73.05	201.24	20.35	6.39	13.92	1.45	7.27	1.5	4	0.618	4.38	0.844	39	15.01	<0.4	2.51988
S4676 40	470.73	117.15	53.64	1142.28	1279.44	77.84	217.09	21.75	6.04	15.44	1.58	7.94	1.62	4.22	0.606	4.33	0.926	60.88	18.73	0.68	2.82392
S4676 41	410.48	113.89	83.84	1682.43	1700.6	111.58	339.6	37.62	7.89	27.71	2.85	13.97	2.83	7.54	0.993	7.07	1.63	59.06	21.13	0.59	3.26143
S4676 42	418.73	110.5	218.45	1169.23	1774.37	147.01	479.19	66.3	16.44	48.34	6.5	33.99	7.33	19.33	2.79	19.22	3.62	150.06	45.53	1.68	2.98704
S4676 43	429.02	98.56	51.55	724.72	890.72	57.93	173.19	18.12	5.53	15.26	1.58	7.68	1.64	4.16	0.619	4.34	0.952	59.65	27.68	0.44	2.38707
S4676 44	383.76	102.5	33.35	527.67	594.58	36.05	99.3	11.92	5.15	8.8	0.925	4.92	1.04	2.92	0.411	2.75	0.625	31.91	33.38	<0.4	2.22458
S4676 45	377.96	112.38	13.54	453.52	456.28	23.73	56.27	4.72	1.74	3.3	0.37	1.82	0.376	0.91	0.108	1.2	0.296	4.54	12.56	<0.4	2.70189
S4676 46	407.22	107.24	117.14	1320.78	1423.57	95.19	292.03	35.16	11.52	29.71	3.49	18.23	3.9	10.69	1.47	9.37	1.92	68.62	45.78	0.91	2.47044
S4676 47	465.29	112.62	145.07	1461.88	2637.42	224.83	687.09	80.06	15.13	52.03	5.53	26.75	4.98	12.43	1.62	10.24	1.68	72.84	12.09	0.61	5.98517
S4676 48	420.3	117.53	236.04	1031.5	1682.68	132.8	435.23	61.15	14.17	49.7	6.09	35.72	7.94	21.33	3.08	22.41	4.04	165.73	53.32	0.98	3.26366
S4676 49	347.37	120.64	424.84	150.73	636.49	102.24	503.72	132.85	28.17	111.85	14.57	75.16	13.55	33.93	4.6	29.85	4.47	30.44	8.86	<0.3	3.76242
S4676 50	456.36	107.77	171.2	1161.28	1428.73	107	352.17	50.24	10.5	41.28	4.91	27.37	5.93	15.89	1.92	14.1	2.74	238.76	83.68	1.14	3.30882
S4676 51	883.88	121.19	145.64	64.6	222.73	31.39	154.51	40.76	14.33	37.43	4.9	25.72	5.19	12.7	1.63	10.61	1.6	3.17	6.84	0.53	4.99863
S4676 52	453.94	112.97	242.09	2159.02	2966.85	224.15	706.77	88.7	22.57	69.84	8.04	40.65	8.28	22.22	2.89	19.27	3.27	111.9	32.21	2.48	2.6449
S4676 53	432.62	113.7	161.96	1110.41	1529.01	113.65	352.94	44.03	10.83	36.21	4.5	25.71	5.34	15.02	2.04	14.45	3.06	83.81	16.71	0.72	2.86129
S4676 54	340.31	106.49	306.33	2584.7	5009.6	451.89	1374.56	172.62	18.15	104.42	11.92	54.51	9.43	22.96	2.88	18	2.71	103.75	27.25	0.74	6.29561
S4676 55	251.05	117.26	524.06	558.71	2347.58	362.37	1599.08	279.9	30.14	171.52	18.72	86.47	15.53	39.23	4.99	31.49	5.04	71.72	12.76	0.47	7.00188
S4676 56	344.53	108.74	157.94	441.04	877.65	74.99	257.47	37.47	5.59	32.36	4.04	21.78	5.13	14.08	2.02	13.96	2.54	118.48	44.6	<0.5	2.80906
S4676 57	500.03	109.98	1145.74	43.21	197.73	36.24	223.67	88.99	13.85	125.86	24.06	165.69	37.62	108.07	15.18	99.13	14.66	3.16	8.06	<0.5	2.79666
S4676 58	395.65	109.54	150.76	1549.29	2182.49	152.81	419.98	43.78	12.95	33.36	3.79	21.73	4.75	13.33	1.96	15.34	3.17	187.9	41.39	2.04	3.50771
S4676 59	348.03	109.63	77.22	1225.96	1619.08	101.88	265.12	23.23	8.71	18.25	1.99	10.21	2.34	6.84	0.99	7.8	1.75	77.89	16	<0.5	2.76791
S4676 60	282.06	108.55	155.31	2122.71	3015.69	198.73	506	50.89	16.67	36.17	4.27	21.87	4.82	13.06	1.9	15.05	2.98	63.1	12.36	0.86	3.06125
S4676 08	77.95	106.7	2537.95	29.83	124.62	23.55	163.69	124.07	12.61	267.05	52.21	346.48	75.24	203.59	27.14	169.93	27.3	5.89	3.45	<0.4	2.03064
S4676 17	65.41	129.38	1432.22	116.32	511.59	80.56	383.1	178.31	6.18	218.34	44.84	260.38	47.19	120.55	15.42	92.31	9.88	1.79	3.94	<0.7	5.27754
S4676 32	113.4	112.31	1071.87	43.39	213.46	40.74	248.6	130.57	5.63	177.5	33.7	199.73	38.64	99.01	13.21	83.69	10.94	2.1	17.4	<0.7	3.4797

## Sheet: Table A7 Ap isotope
Table A7
Grain n°	147Sm	± 2s	143Nd	± 2s	145Nd	± 2s	eNd(0)143	± 2s	fSm/Nd
	144Nd		144Nd		144Nd
S4676-01	0.620568	0.00398596	0.511853	0.000107148	0.348328	7.62933e-05	-15.3182	1.48825	2.1549
S4676-03	0.0697245	0.000187187	0.512316	0.000101232	0.348321	6.21525e-05	-6.27708	1.21241	-0.645529
S4676-04	0.0754231	0.00018659	0.512321	0.000114145	0.3484	8.12495e-05	-6.18703	1.58493	-0.616558
S4676-05	0.0777861	0.000110172	0.512298	7.56247e-05	0.348357	4.99108e-05	-6.63884	0.973606	-0.604545
S4676-06	0.0975925	8.83309e-05	0.512269	5.89257e-05	0.348367	4.34835e-05	-7.19154	0.84823	-0.503851
S4676-07	0.0971399	0.000187447	0.512055	0.000113376	0.348349	6.90668e-05	-11.3762	1.34728	-0.506152
S4676-09	0.0685077	0.000345455	0.512209	0.000134991	0.348205	0.000102291	-8.37182	1.99539	-0.651715
S4676-10	0.0945781	8.96345e-05	0.512171	5.64626e-05	0.348359	3.66395e-05	-9.10216	0.714725	-0.519176
S4676-11	0.104208	0.000115228	0.512677	6.13519e-05	0.348378	4.12869e-05	0.753187	0.805381	-0.470217
S4676-13	0.191267	0.000279786	0.512217	9.37293e-05	0.348386	5.99356e-05	-8.21996	1.16916	-0.0276209
S4676-14	0.0834039	0.000204017	0.512027	0.000114115	0.348282	7.91362e-05	-11.9126	1.5437	-0.575984
S4676-15	0.0613013	0.000208632	0.512231	0.000102616	0.348304	6.99836e-05	-7.93556	1.36517	-0.688351
S4676-16	0.112352	0.000137503	0.512057	9.08061e-05	0.348333	5.79401e-05	-11.3247	1.13023	-0.428814
S4676-17	0.0683268	0.000135966	0.512539	9.04465e-05	0.348292	6.58313e-05	-1.94058	1.28417	-0.652635
S4676-18	0.291183	0.000301406	0.511869	0.000111507	0.348342	7.48252e-05	-15.0061	1.45961	0.480339
S4676-20	0.0824257	0.000173819	0.512353	0.000128506	0.348304	7.72934e-05	-5.55487	1.50776	-0.580957
S4676-21	0.0616834	0.000239103	0.512304	0.000136408	0.348331	0.000102202	-6.52065	1.99365	-0.686409
S4676-22	0.0618664	0.000212992	0.512293	0.000127224	0.348337	7.43594e-05	-6.72126	1.45052	-0.685478
S4676-23	0.0740733	0.000155011	0.512471	9.66651e-05	0.348242	6.17641e-05	-3.25797	1.20483	-0.62342
S4676-24	0.110485	7.35719e-05	0.512243	3.84131e-05	0.348381	2.63732e-05	-7.70064	0.514461	-0.43831
S4676-25	0.154013	0.000389467	0.511397	0.000204644	0.348107	0.000164308	-24.2103	3.20516	-0.217018
S4676-27	0.0938507	8.06712e-05	0.512276	5.8268e-05	0.348399	3.87468e-05	-7.07099	0.755832	-0.522874
S4676-30	0.0791481	6.60996e-05	0.512722	5.31189e-05	0.348353	3.12589e-05	1.63108	0.609765	-0.59762
S4676-33	0.0570489	0.000251813	0.512078	0.000133236	0.348273	0.000107258	-10.9152	2.09227	-0.70997
S4676-35	0.067855	0.000244212	0.512286	0.000122646	0.348191	9.90263e-05	-6.87113	1.9317	-0.655033
S4676-37	0.0675647	0.000250818	0.512152	0.000141834	0.348096	0.000100434	-9.48929	1.95915	-0.656509
S4676-38	0.0603242	0.000171733	0.512239	0.000107457	0.348323	7.84107e-05	-7.7779	1.52955	-0.693319
S4676-41	0.0676106	0.000117798	0.51256	6.69178e-05	0.348387	5.33654e-05	-1.52517	1.041	-0.656276
S4676-42	0.0652324	0.000310734	0.511996	0.000183392	0.348312	0.000114023	-12.518	2.22424	-0.668366
S4676-47	0.0813571	0.000242452	0.512442	9.79205e-05	0.348317	7.78735e-05	-3.82657	1.51907	-0.58639
S4676-48	0.0725583	0.0001254	0.512205	8.09185e-05	0.348298	6.15014e-05	-8.44838	1.1997	-0.631122
S4676-50	0.086554	0.00020303	0.512353	0.000111317	0.348214	7.61802e-05	-5.55643	1.48604	-0.55997
S4676-52	0.0856236	0.000270742	0.512385	0.000158839	0.348347	0.000108121	-4.93259	2.1091	-0.5647
S4676-53	0.0636938	0.000229112	0.512444	0.000129263	0.348372	9.74904e-05	-3.78908	1.90174	-0.676188
S4676-54	0.0790216	0.000136969	0.512517	8.09228e-05	0.348386	5.08715e-05	-2.36865	0.992348	-0.598263
S4676-55	0.0784762	0.000372023	0.512029	0.000200053	0.348156	0.000133123	-11.8862	2.59681	-0.601036
S4676-56	0.0804514	8.21282e-05	0.512184	5.17713e-05	0.348311	3.41217e-05	-8.8535	0.66561	-0.590994

## Sheet: Table A8 Rutile
Table A8
Grain n°	SiO2	Al2O3	FeO	CaO	TiO2	ZrO2	HfO2	V2O3	Nb2O5	Ta2O5	Cr2O3	WO3	Total
1	-	-	0.049	0.007	98.767	0.053	-	0.773	0.225	-	0.442	0.253	100.569
2	-	-	0.04	-	97.35	0.059	0.001	0.721	0.264	0.161	0.345	0.539	99.48
5	-	-	0.099	0.003	98.94	0.154	-	0.749	0.164	-	0.119	-	100.228
6	-	0.022	0.111	-	99.463	0.085	-	0.809	0.182	-	0.09	-	100.762
7	-	0.006	0.077	0.016	98.055	0.112	0.005	0.626	0.198	-	0.08	-	99.175
9	-	0.029	0.033	0.008	98.062	0.064	0.064	0.926	0.138	-	0.242	0.106	99.672
10	-	0.001	0.055	-	97.806	0.458	0.018	0.676	0.153	0.075	0.066	0.129	99.437
11	0.024	0.015	0.438	-	98.39	-	0.208	0.663	0.446	0.058	0.133	0.308	100.683
12	-	-	0.395	-	98.473	0.021	-	0.765	0.36	0.043	0.137	0.744	100.938
13	-	0.01	0.001	0.006	99.163	-	-	0.814	0.221	0.081	0.142	-	100.438
14	0.003	-	0.09	0.018	99.189	0.032	-	0.72	0.214	-	0.095	-	100.361
15	0.016	-	0.031	-	95.633	0.128	-	0.714	0.438	0.02	1.156	1.105	99.241
16	-	0.004	2.042	0.014	96.875	0.043	0.01	0.508	0.138	0.131	0.07	0.864	100.699
20	-	-	0.433	0.004	96.643	0.069	-	0.803	0.491	0.049	0.165	0.476	99.133
21	0.009	-	0.46	-	98.355	0.032	-	0.584	0.622	0.023	0.071	-	100.156
22	-	-	0.435	-	97.417	0.048	-	0.548	0.538	0.158	0.298	0.003	99.445
23	-	0.021	0.066	-	98.544	0.08	0.053	0.87	0.26	0.184	0.081	-	100.159
24	0.001	-	0.031	0.008	98.901	0.043	0.031	0.827	0.225	-	0.142	0.406	100.615
25	-	-	1.223	-	96.033	0.091	0.005	0.538	1.92	0.218	0.132	0.578	100.738
27	0.001	0.014	0.138	0.007	97.403	0.048	-	0.601	0.513	0.012	0.166	0.241	99.144
30	0.031	0.007	1.399	-	97.786	0.144	-	0.534	0.133	-	0.028	-	100.062
31	-	0.019	0.174	-	97.097	0.117	0.004	0.623	0.538	0.023	0.099	0.327	99.021
32	-	0.005	0.065	0.004	98.989	0.155	0.053	0.561	0.037	0.095	0.189	0.434	100.587
33	0.012	0.021	0.074	-	99.47	0.011	0.152	0.485	0.115	0.078	0.185	0.08	100.683
34	0.005	0.003	0.282	0.002	98.075	0.117	-	0.491	0.479	-	0	0.355	99.809
35	-	0.001	0.236	0.012	98.431	0.048	-	1.072	0.069	-	0.033	-	99.902
37	-	0.016	0.079	0.009	98.694	0.122	-	0.759	0.056	0.075	0.794	0.096	100.7
38	-	-	0.477	0.017	97.193	0.107	0.007	0.599	0.517	0.023	0.066	1.04	100.046
39	0.008	-	0.574	0.014	97.58	-	-	0.606	1.117	-	0.042	-	99.941
40	0.003	0.007	0.498	0.01	98.695	0.069	0.128	0.714	0.218	0.095	0.094	0.264	100.795
41	-	0.029	0.145	0.01	98.357	0.053	0.007	0.725	0.008	0.034	0.707	0.356	100.431
42	-	-	0.104	0.012	98.22	0.159	-	0.835	0.345	0.109	0.397	-	100.181
43	-	-	0.029	0.005	98.625	0.207	0.094	0.848	0.473	0.103	0.293	0.02	100.697
45	0.005	0.016	0.188	0.013	98.081	0.091	-	0.696	0.3	0.052	0.052	0.039	99.533
47	-	0.014	0.25	0.023	97.112	0.016	-	0.639	0.401	-	0.028	0.628	99.111
48	-	0.019	0.172	0.008	97.387	0.069	-	0.603	0.381	0.121	0.284	0.194	99.238
49	-	-	0.017	0.002	98.542	0.107	0.019	1.047	0.427	0.104	0.346	0.35	100.961
50	0.012	-	0.149	0.008	99.252	0.032	0.033	0.758	0.273	0.014	0.014	-	100.545
51	-	0.019	0.216	0.011	97.422	0.085	-	0.791	0.763	-	0.232	0.3	99.839
52	-	-	0.349	0.006	98.728	-	0.074	0.688	0.344	0.086	0	0.123	100.398
53	0.001	0.004	0.104	-	96.903	0.08	0.041	0.716	0.94	0.112	0.417	0.175	99.493
54	0.022	-	0.187	-	98.14	0.048	-	0.894	0.365	-	0.498	-	100.154
56	0.002	0.011	0.245	0.007	99.701	0.011	-	0.647	0.01	-	0.024	-	100.658
58	-	0.006	0.055	-	98.926	0.149	-	0.759	0.258	-	0.161	0.052	100.366
59	0.004	0.013	0.01	-	96.263	0.144	-	1.236	0.367	0.153	0.924	0.339	99.453
60	-	0.02	2.401	-	92.341	0.113	0.004	0.587	3.08	0.435	0.019	1.641	100.641
61	-	0.017	0.172	0.014	98.64	-	-	0.52	0.042	-	0.157	-	99.562
57	-	0.003	0.289	-	99.909	-	-	0.538	0.052	0.104	0.109	-	101.004
19	-	-	0.185	0.014	100.151	-	-	0.62	0.062	-	-	0.226	101.258
44	-	0.013	0.261	-	99.99	-	-	0.571	0.135	0.049	0.208	0.487	101.714
55	-	0.016	0.369	-	98.588	0.005	-	0.637	0.712	0.181	0.156	1.057	101.721
26	0.007	0.01	0.383	0.01	94.764	0.043	0.064	0.577	0.533	0.049	0.052	0.108	96.6
46	-	0.026	0.071	0.013	95.935	0.064	0.071	0.975	0.241	-	0.119	-	97.515
3	-	-	0.023	0.01	96.789	0.027	-	0.784	0.233	0.112	0.322	-	98.3
4	-	0.019	0.121	-	96.92	0.053	0.016	0.535	0.386	0.026	0.389	-	98.465
17	0.01	0.005	1.418	0.017	94.184	-	0.119	0.517	2.162	0.126	0.014	-	98.572
18	-	0.005	3.104	0.023	91.935	0.08	-	0.703	1.93	0.203	0.122	0.624	98.729
29	-	-	0.408	0.002	97.181	0.096	-	0.94	0.12	-	0.019	-	98.766
36	-	0.005	0.394	0.015	97.047	-	-	0.605	0.429	-	0.024	0.279	98.798
28	0.007	0.032	0.729	0.017	96.56	0.123	0.059	0.62	0.22	-	0.028	0.444	98.839
8	-	-	0.071	-	97.609	-	0.142	0.682	0.067	0.057	0.218	-	98.846

## Sheet: Table A9 Garnet
Table A9
Grain n°	SiO2	Al2O3	FeO	MnO	MgO	CaO	TiO2	ZrO2	V2O3	Cr2O3	Total
1	36.567	21.221	21.034	18.223	0.126	3.688	0.003	-	-	0.036	100.898
2	36.206	21.72	35.058	6.17	0.545	0.341	-	-	-	0.039	100.079
3	36.75	21.292	20.997	12.531	0.093	9.109	0.021	-	-	0.05	100.843
5	36.752	21.892	30.313	10.479	0.64	0.375	-	-	-	-	100.451
10	37.294	21.747	26.548	13.145	1.068	0.359	-	-	-	0.022	100.183
12	36.722	21.239	24.224	17.029	0.228	0.642	-	-	-	-	100.084
15	36.57	21.498	32.263	8.907	0.715	0.247	-	-	-	-	100.2
16	36.186	21.278	25.261	16.332	0.351	0.378	-	-	-	0.057	99.843
17	35.865	21.156	17.686	25.583	-	0.204	-	-	-	-	100.494
18	36.682	21.278	32.48	8.311	0.69	0.229	-	-	-	-	99.67
19	36.105	21.494	37.035	5.097	0.335	0.257	-	-	-	-	100.323
21	36.545	21.195	33.717	8.17	0.386	0.348	-	-	-	-	100.361
24	36.713	21.637	32.159	9.088	0.567	0.456	-	-	-	0.061	100.681
25	36.577	21.696	32.972	7.777	0.604	0.546	-	-	-	-	100.172
26	36.281	21.164	22.918	18.893	0.821	0.134	0.011	-	-	-	100.222
27	36.387	21.565	30.228	11.804	0.42	0.304	-	-	-	0.013	100.721
31	36.036	21.31	24.057	17.641	0.585	0.075	-	-	-	-	99.704
32	35.836	21.418	30.498	10.923	0.383	0.174	-	-	-	-	99.232
33	36.088	21.124	28.131	13.47	0.435	0.405	-	-	-	0.013	99.666
34	35.793	21.195	27.466	15.034	0.405	0.226	-	-	-	0.009	100.128
35	36.719	21.236	25.204	15.348	0.756	0.26	-	-	-	-	99.523
36	36.394	21.277	31.046	10.772	0.448	0.29	-	-	-	-	100.227
37	37.034	21.563	27.942	13.409	0.422	0.369	-	-	-	-	100.739
38	35.554	21.092	24.055	17.507	0.792	0.103	-	-	-	0.053	99.156
39	36.262	20.727	17.263	24.785	0.079	1.866	-	-	-	-	100.982
40	36.923	21.793	25.364	12.702	1.184	1.764	-	-	-	-	99.73
41	35.963	21.201	25.395	16.459	0.29	0.435	-	-	-	-	99.743
43	36.369	21.087	26.148	14.73	0.491	0.485	-	-	-	-	99.31
49	36.031	20.914	26.422	14.901	0.444	1.133	-	-	-	-	99.845
51	35.329	20.617	18.298	24.683	0.295	0.121	-	0.018	-	-	99.361
52	36.24	21.124	25.753	14.913	0.67	0.602	-	-	0.002	-	99.304
53	35.121	20.772	24.607	18.261	0.178	0.177	-	-	-	-	99.116
55	36.153	21.61	31.241	10.803	0.342	0.168	-	0.043	-	-	100.36
56	35.969	21.42	33.334	7.732	0.573	0.338	-	-	-	-	99.366
57	35.714	21.203	34.711	6.874	0.51	0.334	0.008	0.044	0.006	0.026	99.43
58	36.104	21.188	30.311	12.43	0.34	0.208	0.027	0.025	0.016	0.03	100.679
59	35.219	21.079	20.451	23.361	0.002	0.088	0.017	-	-	0.022	100.239
61	36.13	21.499	33.695	8.133	0.291	0.391	0.013	-	0.029	-	100.181
64	35.896	21.113	26.022	16.121	0.186	0.319	-	-	0.013	0.009	99.679
65	35.437	20.648	36.287	6.548	0.281	0.309	-	0.016	-	-	99.526
66	35.118	21.17	25.356	17.011	0.299	0.366	-	-	0.031	0.026	99.377
67	36.008	21.24	32.367	10.206	0.389	0.218	-	-	0.02	0.026	100.474
68	36.472	21.074	30.985	10.781	0.484	0.443	0.013	-	-	-	100.252
73	35.829	20.862	35.407	5.989	0.31	1.337	-	0.002	-	0.021	99.757
29	36.287	21.736	32.363	10.068	0.316	0.236	0.011	-	-	-	101.017
63	36.462	21.664	34.446	7.768	0.481	0.22	-	0.014	-	-	101.055
46	36.107	21.44	28.04	14.957	0.224	0.316	-	-	-	-	101.084
50	36.512	21.312	22.596	18.38	0.32	1.974	0.019	-	-	-	101.113
48	36.611	21.58	30.313	9.439	0.451	2.79	-	-	-	-	101.184
20	36.303	21.265	31.44	12	0.197	0.201	-	-	-	-	101.406
9	36.949	21.772	29.301	12.685	0.664	0.177	-	-	-	0.074	101.622
30	36.926	21.811	33.484	8.833	0.339	0.276	-	-	-	-	101.669
45	36.191	21.676	30.565	12.363	0.185	0.676	-	-	-	0.013	101.669
42	36.875	21.545	30.485	12.356	0.218	0.183	-	-	-	0.035	101.697
44	36.599	21.461	27.604	12.19	0.023	4.116	0.003	-	-	-	101.996
69	37.275	21.422	22.03	21.271	0.073	0.143	-	-	0.015	0.053	102.282
8	37.241	21.699	21.762	21.314	0.105	0.3	0.09	-	-	0.009	102.52
4	39.737	24.394	26.277	11.06	1.072	0.374	-	-	-	-	102.914
7	38.992	23.278	34.826	6.525	0.345	0.335	-	-	-	0.026	104.327
6	39.643	23.358	25.826	15.971	0.387	0.402	-	-	-	0.009	105.596
70	41.178	24.635	30.74	7.933	1.157	0.533	0.005	0.053	0.009	0.013	106.256
14	30.306	17.599	38.807	3.27	0.144	0.411	0.032	-	-	0.034	90.603
28	32.345	18.604	23.964	17.042	0.172	0.626	-	-	-	-	92.753
47	35.14	20.647	22.052	14.187	0.526	0.316	-	-	-	-	92.868
22	33.533	19.328	22.042	18.595	0.236	0.708	-	-	-	0.035	94.477
23	35.265	21.022	28.067	10.318	0.51	0.272	-	-	-	0.013	95.467
13	34.223	20.148	29.913	12.485	0.295	0.335	-	-	-	-	97.399
74	34.417	20.555	33.567	7.448	0.608	0.89	-	0.023	0.019	0.009	97.536
71	34.557	20.438	31.801	10.714	0.215	0.369	-	0.009	0.019	-	98.122
54	34.99	20.133	19.01	23.577	0.251	0.364	0.107	-	0.032	0.018	98.482
60	35.986	21.035	29.82	10.751	0.35	0.607	-	-	-	0.052	98.601
62	37.823	22.273	29.036	8.614	0.523	0.437	-	0.037	0.008	0.044	98.795
72	35.539	20.556	22.055	18.429	0.323	1.956	-	0.002	0.012	-	98.872
11	36.285	21.361	30.43	10.009	0.58	0.216	-	-	-	-	98.881

## Sheet: Table A10 Monazite
Table A10
Grain n°	SiO2	CaO	Y2O3	La2O3	Ce2O3	Pr2O3	Nd2O3	Sm2O3	Eu2O3	Gd2O3	Dy2O3	Er2O3	Tm2O3	ThO2	UO2	Nb2O5	Ta2O5	PbO	P2O5	Total
1	1.601	1.337	1.683	11.458	25.88	2.511	10.472	2.156	0.349	0.962	0.335	0.08	0.081	11.424	0.65	-	-	-	28.449	99.428
2	1.693	0.47	1.439	13.733	29.777	2.846	9.97	1.439	0.141	0.239	0.174	0.028	-	8.771	0.379	-	0.041	-	28.785	99.925
4	4.913	0.571	0.787	10.919	22.859	2.11	8.872	1.643	-	0.703	-	-	-	22.741	0.697	0.01	-	-	22.605	99.43
6	2.397	0.476	0.873	14.675	29.43	2.616	9.109	1.194	-	0.487	0.018	-	-	11.519	0.486	0.035	-	-	26.989	100.304
9	4.117	0.633	0.743	12.417	25.211	2.234	8.618	1.258	0.083	0.538	0.024	-	0.078	18.862	0.685	0.034	-	-	24.384	99.919
10	1.769	1.501	1.847	12.439	25.788	2.374	9.024	1.852	-	0.9	0.06	0.082	-	13.271	0.751	0.045	-	-	28.017	99.72
11	2.424	0.589	1.356	13.624	28.551	2.717	10.143	1.538	-	0.263	0.085	0.084	0.019	11.306	0.499	0.019	-	-	26.971	100.188
14	3.939	0.438	0.651	13.231	25.766	2.242	9.019	1.605	-	0.412	-	-	-	17.339	0.602	-	-	-	25.236	100.48
15	3.139	0.543	1.063	13.438	26.949	2.335	9.288	1.371	0.112	0.416	0.153	-	-	14.863	0.587	0.042	-	-	25.741	100.04
16	2.635	0.675	0.673	14.116	28.677	2.324	9.09	1.235	-	0.16	0.151	-	0.11	12.414	0.452	0.032	-	-	26.662	99.406
17	2.691	0.527	2.17	12.427	26.495	2.503	9.94	1.765	0.146	0.895	0.167	0.111	0.049	12.638	0.567	-	-	-	27.302	100.393
18	1.529	0.605	1.932	14.483	29.229	2.738	9.792	1.59	-	0.566	0.036	0.077	0.066	8.257	0.436	-	-	-	28.818	100.154
23	0.188	1.689	1.533	14.8	29.304	2.642	9.247	1.379	-	0.388	0.157	0.095	0.159	6.645	0.92	0.011	-	-	30.484	99.641
24	1.66	0.388	1.025	14.712	31.139	2.609	10.269	1.38	-	0.449	0.154	-	-	8.004	0.321	-	-	-	28.344	100.454
25	3.646	0.534	1.073	13.044	26.839	2.534	8.11	1.408	-	0.447	0.014	0.019	-	16.383	0.708	-	-	-	25.325	100.084
26	2.505	0.982	2.636	10.783	24.508	2.522	10.176	2.52	0.35	1.298	0.248	0.092	0.088	13.931	0.732	-	-	-	26.769	100.14
27	3.958	0.608	1.58	12.121	25.504	2.4	8.477	1.27	0.033	0.623	0.374	0.002	-	17.885	1.087	-	-	-	23.919	99.841
28	4.101	0.59	0.773	13.239	25.846	2.397	8.274	1.338	-	0.303	0.127	-	0.116	17.118	0.791	-	-	-	24.182	99.195
29	1.134	0.417	1.326	15.789	31.954	2.655	9.163	1.398	-	0.254	-	0.096	-	5.992	0.423	-	-	-	28.893	99.494
30	1.348	1.134	2.582	13.142	26.997	2.527	9.605	1.71	0.181	0.841	0.176	0.07	-	9.612	0.809	-	-	-	29.29	100.024
31	2.591	0.548	1.224	13.777	27.985	2.486	9.27	1.488	0.039	0.661	0.216	0.069	-	12.436	0.513	0.011	-	-	26.998	100.312
32	0.22	1.274	1.783	13.512	29.158	2.819	11.727	2.177	-	1.196	0.202	0.105	0.061	5.36	0.337	0.044	-	-	30.932	100.907
33	1.564	0.618	2.518	13.82	29.371	2.875	10.613	1.608	-	0.79	-	0.126	0.142	6.877	0.729	-	-	-	28.774	100.425
35	1.483	0.478	1.248	15.113	31.189	2.929	9.866	1.341	-	0.263	0.192	0.096	-	7.195	0.44	-	-	-	28.55	100.383
36	1.833	1.57	2.581	11.44	24.83	2.397	10.002	1.818	-	1.326	0.226	0.066	-	13.24	0.817	-	0.033	-	28.593	100.772
37	2.566	0.733	2.867	12.927	26.198	2.362	8.766	1.476	0.303	1.281	0.244	0.171	0.079	12.61	0.857	0.04	0.026	-	27.082	100.588
38	1.852	0.811	1.355	15.108	29.308	2.6	9.221	1.338	0.062	0.228	-	0.019	-	9.419	0.576	-	0.051	-	27.885	99.833
39	0.44	1.314	2.038	12.53	27.965	2.73	10.85	3.067	-	1.087	0.06	0.043	0.154	6.759	0.466	0.027	-	-	30.377	99.907
40	3.818	0.505	1.499	11.805	24.523	2.389	9.853	1.943	-	0.773	-	0.028	-	18.089	0.481	0.003	-	-	24.61	100.319
41	2.399	0.649	1.15	13.957	28.672	2.816	9.056	1.318	0.178	0.024	-	0.003	0.056	11.336	0.657	-	-	-	27.233	99.504
42	3.328	0.573	0.978	12.332	26.143	2.758	9.251	1.615	-	0.504	0.054	-	-	16.289	0.519	0.003	0.186	-	24.753	99.286
43	0.565	2.902	2.13	11.568	24.211	2.404	8.854	1.42	0.019	0.897	0.237	0.187	-	13.569	1.351	0.035	-	-	30.358	100.707
45	4.236	0.623	0.716	12.354	25.689	2.362	8.282	1.335	-	0.133	-	0.014	0.028	19.425	0.756	-	-	-	24.084	100.037
46	1.88	0.585	1.608	14.137	29.362	2.811	9.874	1.665	0.241	0.485	0.277	0.042	-	8.929	0.474	-	0.015	-	27.351	99.736
47	2.249	0.878	0.721	13.436	28.219	2.58	9.925	1.431	-	0.634	-	-	-	12.404	0.489	-	-	-	27.513	100.479
49	3.887	0.668	1.19	11.946	24.588	2.556	9.638	1.678	0.089	0.848	-	-	-	18.097	0.83	0.063	-	-	24.774	100.852
50	0.44	0.579	3.422	13.047	28.786	2.859	12.072	2.342	0.122	1.396	0.214	0.242	-	3.676	0.404	-	-	-	30.558	100.159
3	3.185	0.567	1.401	11.696	25.699	2.442	9.418	1.439	0.063	0.712	-	0.042	-	14.808	0.689	-	-	-	26.253	98.414
5	2.637	0.569	1.211	13.046	26.972	2.496	8.523	1.549	-	0.765	-	0.112	0.079	13.112	0.425	-	-	-	26.085	97.581
7	2.702	1.066	2.165	11.525	24.558	2.313	9.028	1.827	0.056	0.962	0.255	0.186	-	14.039	0.935	0.045	0.018	-	26.263	97.943
8	1.696	0.82	1.777	11.17	27.659	2.749	10.815	2.159	-	0.865	0.2	-	-	9.722	0.545	-	0.044	-	28.271	98.492
12	0.944	0.387	1.563	15.626	30.99	2.838	10.495	1.679	0.068	0.513	0.147	-	-	5.427	0.201	0.038	-	-	27.818	98.734
13	1.723	0.432	1.24	14.316	30.257	2.796	9.875	1.091	0.036	0.139	0.035	0.014	-	7.983	0.46	-	-	-	27.84	98.237
19	0.82	0.924	0.831	15.17	30.647	2.79	10.888	1.322	-	0.251	0.085	-	0.002	6.116	0.152	-	-	-	28.895	98.893
20	0.802	0.871	2.332	13.252	28.582	3.023	11.588	2.135	0.336	1.022	0.536	0.086	0.11	6.262	0.603	0.011	-	-	30.411	101.962
21	2.027	0.543	2.548	13.688	28.713	2.478	9.242	1.576	0.075	0.337	0.206	0.046	0.01	9.43	0.586	-	-	-	26.997	98.502
22	2.879	0.671	1.067	12.35	27.757	2.74	10.265	1.661	0.352	0.692	-	-	0.042	13.681	0.466	0.019	0.177	-	27.16	101.979
34	2.4	0.683	0.698	13.68	28.731	2.705	10.405	1.815	-	0.569	-	-	-	11.698	0.692	0.045	-	-	27.816	101.937
44	2.943	0.635	0.772	13.858	28.262	2.75	9.054	1.489	0.028	0.306	-	-	-	14.152	0.377	-	0.077	-	26.355	101.058
48	0.332	2.176	2.092	12.601	25.977	2.395	9.648	1.627	-	1.047	0.281	0.2	0.088	8.122	1.418	0.062	-	-	30.396	98.462

[truncated: 2 more sheets: Table A11 Raman, Sheet1]
