# Supplementary material
Source: publisher figshare collection journal article supplement (https://gsapubs.figshare.com/ndownloader/files/23313071)
Supplement: Supplementary file 2 [file 23313071 › doc.kml]

<?xml version="1.0" encoding="UTF-8"?>
<kml xmlns="http://www.opengis.net/kml/2.2">
  <Document>
    <name>Mappa senza titolo</name>
    <description/>
    <Style id="icon-1899-0288D1-normal">
      <IconStyle>
        <scale>1</scale>
        <Icon>
          <href>images/icon-1.png</href>
        </Icon>
        <hotSpot x="16" xunits="pixels" y="32" yunits="insetPixels"/>
      </IconStyle>
      <LabelStyle>
        <scale>0</scale>
      </LabelStyle>
    </Style>
    <Style id="icon-1899-0288D1-highlight">
      <IconStyle>
        <scale>1</scale>
        <Icon>
          <href>images/icon-1.png</href>
        </Icon>
        <hotSpot x="16" xunits="pixels" y="32" yunits="insetPixels"/>
      </IconStyle>
      <LabelStyle>
        <scale>1</scale>
      </LabelStyle>
    </Style>
    <StyleMap id="icon-1899-0288D1">
      <Pair>
        <key>normal</key>
        <styleUrl>#icon-1899-0288D1-normal</styleUrl>
      </Pair>
      <Pair>
        <key>highlight</key>
        <styleUrl>#icon-1899-0288D1-highlight</styleUrl>
      </Pair>
    </StyleMap>
    <Folder>
      <name>Lhasariver GE.xls</name>
      <Placemark>
        <name>S4674</name>
        <description><![CDATA[River: Miggi<br>Locality: Pangduo<br>Collected by/ received from: E.Garzanti/G.Sun<br>Year: 2013<br>Latitude: 30°12'08" N<br>Longitude: 91°21'18" E<br>Drainage: Lhasa]]></description>
        <styleUrl>#icon-1899-0288D1</styleUrl>
        <ExtendedData>
          <Data name="River">
            <value>Miggi</value>
          </Data>
          <Data name="Locality">
            <value>Pangduo</value>
          </Data>
          <Data name="Collected by/ received from">
            <value>E.Garzanti/G.Sun</value>
          </Data>
          <Data name="Year">
            <value>2013.0</value>
          </Data>
          <Data name="Latitude">
            <value><![CDATA[30°12'08" N]]></value>
          </Data>
          <Data name="Longitude">
            <value><![CDATA[91°21'18" E]]></value>
          </Data>
          <Data name="Drainage">
            <value>Lhasa</value>
          </Data>
        </ExtendedData>
        <Point>
          <coordinates>
            91.355,30.2022222222222,0
          </coordinates>
        </Point>
      </Placemark>
      <Placemark>
        <name>S4670</name>
        <description><![CDATA[River: Nyainqêntanglha<br>Locality: Duiling<br>Collected by/ received from: E.Garzanti/G.Sun<br>Year: 2013<br>Latitude: 30°17'53" N<br>Longitude: 90°46'58" E<br>Drainage: Dam]]></description>
        <styleUrl>#icon-1899-0288D1</styleUrl>
        <ExtendedData>
          <Data name="River">
            <value>Nyainqêntanglha</value>
          </Data>
          <Data name="Locality">
            <value>Duiling</value>
          </Data>
          <Data name="Collected by/ received from">
            <value>E.Garzanti/G.Sun</value>
          </Data>
          <Data name="Year">
            <value>2013.0</value>
          </Data>
          <Data name="Latitude">
            <value><![CDATA[30°17'53" N]]></value>
          </Data>
          <Data name="Longitude">
            <value><![CDATA[90°46'58" E]]></value>
          </Data>
          <Data name="Drainage">
            <value>Dam</value>
          </Data>
        </ExtendedData>
        <Point>
          <coordinates>
            90.7827777777778,30.2980555555556,0
          </coordinates>
        </Point>
      </Placemark>
      <Placemark>
        <name>S4672</name>
        <description><![CDATA[River: Womaguo<br>Locality: Womaguo<br>Collected by/ received from: E.Garzanti/G.Sun<br>Year: 2013<br>Latitude: 30°22'31" N<br>Longitude: 90°56'47" E<br>Drainage: Nyainqêntanglha]]></description>
        <styleUrl>#icon-1899-0288D1</styleUrl>
        <ExtendedData>
          <Data name="River">
            <value>Womaguo</value>
          </Data>
          <Data name="Locality">
            <value>Womaguo</value>
          </Data>
          <Data name="Collected by/ received from">
            <value>E.Garzanti/G.Sun</value>
          </Data>
          <Data name="Year">
            <value>2013.0</value>
          </Data>
          <Data name="Latitude">
            <value><![CDATA[30°22'31" N]]></value>
          </Data>
          <Data name="Longitude">
            <value><![CDATA[90°56'47" E]]></value>
          </Data>
          <Data name="Drainage">
            <value>Nyainqêntanglha</value>
          </Data>
        </ExtendedData>
        <Point>
          <coordinates>
            90.9463888888889,30.3752777777778,0
          </coordinates>
        </Point>
      </Placemark>
      <Placemark>
        <name>S4671</name>
        <description><![CDATA[River: Dam<br>Locality: Quxiama<br>Collected by/ received from: E.Garzanti/G.Sun<br>Year: 2013<br>Latitude: 30°24'23" N<br>Longitude: 90°58'46" E<br>Drainage: Lhasa]]></description>
        <styleUrl>#icon-1899-0288D1</styleUrl>
        <ExtendedData>
          <Data name="River">
            <value>Dam</value>
          </Data>
          <Data name="Locality">
            <value>Quxiama</value>
          </Data>
          <Data name="Collected by/ received from">
            <value>E.Garzanti/G.Sun</value>
          </Data>
          <Data name="Year">
            <value>2013.0</value>
          </Data>
          <Data name="Latitude">
            <value><![CDATA[30°24'23" N]]></value>
          </Data>
          <Data name="Longitude">
            <value><![CDATA[90°58'46" E]]></value>
          </Data>
          <Data name="Drainage">
            <value>Lhasa</value>
          </Data>
        </ExtendedData>
        <Point>
          <coordinates>
            90.9794444444444,30.4063888888889,0
          </coordinates>
        </Point>
      </Placemark>
      <Placemark>
        <name>S4673</name>
        <description><![CDATA[River: Dam<br>Locality: Zhanai<br>Collected by/ received from: E.Garzanti/G.Sun<br>Year: 2013<br>Latitude: 30°13'25" N<br>Longitude: 91°19'05" E<br>Drainage: Lhasa]]></description>
        <styleUrl>#icon-1899-0288D1</styleUrl>
        <ExtendedData>
          <Data name="River">
            <value>Dam</value>
          </Data>
          <Data name="Locality">
            <value>Zhanai</value>
          </Data>
          <Data name="Collected by/ received from">
            <value>E.Garzanti/G.Sun</value>
          </Data>
          <Data name="Year">
            <value>2013.0</value>
          </Data>
          <Data name="Latitude">
            <value><![CDATA[30°13'25" N]]></value>
          </Data>
          <Data name="Longitude">
            <value><![CDATA[91°19'05" E]]></value>
          </Data>
          <Data name="Drainage">
            <value>Lhasa</value>
          </Data>
        </ExtendedData>
        <Point>
          <coordinates>
            91.3180555555555,30.2236111111111,0
          </coordinates>
        </Point>
      </Placemark>
      <Placemark>
        <name>S5297</name>
        <description><![CDATA[River: Lhasa<br>Locality: Jiangga<br>Collected by/ received from: J-G. Wang<br>Year: 2017<br>Latitude: 30°02'58" N<br>Longitude: 91°48'47" E<br>Drainage: Yarlung Tsangpo]]></description>
        <styleUrl>#icon-1899-0288D1</styleUrl>
        <ExtendedData>
          <Data name="River">
            <value>Lhasa</value>
          </Data>
          <Data name="Locality">
            <value>Jiangga</value>
          </Data>
          <Data name="Collected by/ received from">
            <value>J-G. Wang</value>
          </Data>
          <Data name="Year">
            <value>2017.0</value>
          </Data>
          <Data name="Latitude">
            <value><![CDATA[30°02'58" N]]></value>
          </Data>
          <Data name="Longitude">
            <value><![CDATA[91°48'47" E]]></value>
          </Data>
          <Data name="Drainage">
            <value>Yarlung Tsangpo</value>
          </Data>
        </ExtendedData>
        <Point>
          <coordinates>
            91.8130555555556,30.0494444444444,0
          </coordinates>
        </Point>
      </Placemark>
      <Placemark>
        <name>S5298</name>
        <description><![CDATA[River: Drigung<br>Locality: Qimaka<br>Collected by/ received from: J-G. Wang<br>Year: 2017<br>Latitude: 30°00'09" N<br>Longitude: 91°55'49" E<br>Drainage: Lhasa]]></description>
        <styleUrl>#icon-1899-0288D1</styleUrl>
        <ExtendedData>
          <Data name="River">
            <value>Drigung</value>
          </Data>
          <Data name="Locality">
            <value>Qimaka</value>
          </Data>
          <Data name="Collected by/ received from">
            <value>J-G. Wang</value>
          </Data>
          <Data name="Year">
            <value>2017.0</value>
          </Data>
          <Data name="Latitude">
            <value><![CDATA[30°00'09" N]]></value>
          </Data>
          <Data name="Longitude">
            <value><![CDATA[91°55'49" E]]></value>
          </Data>
          <Data name="Drainage">
            <value>Lhasa</value>
          </Data>
        </ExtendedData>
        <Point>
          <coordinates>
            91.9302777777778,30.0025,0
          </coordinates>
        </Point>
      </Placemark>
      <Placemark>
        <name>S5299</name>
        <description><![CDATA[River: Jiamogang<br>Locality: Zhikong<br>Collected by/ received from: J-G. Wang<br>Year: 2017<br>Latitude: 29°58'55" N<br>Longitude: 91°54'30" E<br>Drainage: Lhasa]]></description>
        <styleUrl>#icon-1899-0288D1</styleUrl>
        <ExtendedData>
          <Data name="River">
            <value>Jiamogang</value>
          </Data>
          <Data name="Locality">
            <value>Zhikong</value>
          </Data>
          <Data name="Collected by/ received from">
            <value>J-G. Wang</value>
          </Data>
          <Data name="Year">
            <value>2017.0</value>
          </Data>
          <Data name="Latitude">
            <value><![CDATA[29°58'55" N]]></value>
          </Data>
          <Data name="Longitude">
            <value><![CDATA[91°54'30" E]]></value>
          </Data>
          <Data name="Drainage">
            <value>Lhasa</value>
          </Data>
        </ExtendedData>
        <Point>
          <coordinates>
            91.9083333333333,29.9819444444444,0
          </coordinates>
        </Point>
      </Placemark>
      <Placemark>
        <name>S5300</name>
        <description><![CDATA[River: Lhasa<br>Locality: Gongmo<br>Collected by/ received from: J-G. Wang<br>Year: 2017<br>Latitude: 29°55'54" N<br>Longitude: 91°51'03" E<br>Drainage: Yarlung Tsangpo]]></description>
        <styleUrl>#icon-1899-0288D1</styleUrl>
        <ExtendedData>
          <Data name="River">
            <value>Lhasa</value>
          </Data>
          <Data name="Locality">
            <value>Gongmo</value>
          </Data>
          <Data name="Collected by/ received from">
            <value>J-G. Wang</value>
          </Data>
          <Data name="Year">
            <value>2017.0</value>
          </Data>
          <Data name="Latitude">
            <value><![CDATA[29°55'54" N]]></value>
          </Data>
          <Data name="Longitude">
            <value><![CDATA[91°51'03" E]]></value>
          </Data>
          <Data name="Drainage">
            <value>Yarlung Tsangpo</value>
          </Data>
        </ExtendedData>
        <Point>
          <coordinates>
            91.8508333333333,29.9316666666667,0
          </coordinates>
        </Point>
      </Placemark>
      <Placemark>
        <name>S4675</name>
        <description><![CDATA[River: Maizho<br>Locality: Maizhokunggar<br>Collected by/ received from: E.Garzanti/G.Sun/J.Li<br>Year: 2013<br>Latitude: 29°50'31" N<br>Longitude: 91°44'24" E<br>Drainage: Lhasa]]></description>
        <styleUrl>#icon-1899-0288D1</styleUrl>
        <ExtendedData>
          <Data name="River">
            <value>Maizho</value>
          </Data>
          <Data name="Locality">
            <value>Maizhokunggar</value>
          </Data>
          <Data name="Collected by/ received from">
            <value>E.Garzanti/G.Sun/J.Li</value>
          </Data>
          <Data name="Year">
            <value>2013.0</value>
          </Data>
          <Data name="Latitude">
            <value><![CDATA[29°50'31" N]]></value>
          </Data>
          <Data name="Longitude">
            <value><![CDATA[91°44'24" E]]></value>
          </Data>
          <Data name="Drainage">
            <value>Lhasa</value>
          </Data>
        </ExtendedData>
        <Point>
          <coordinates>
            91.74,29.8419444444444,0
          </coordinates>
        </Point>
      </Placemark>
      <Placemark>
        <name>S5301</name>
        <description><![CDATA[River: Pengbo<br>Locality: Jiongba<br>Collected by/ received from: J-G. Wang<br>Year: 2017<br>Latitude: 29°51'25" N<br>Longitude: 91°21'02" E<br>Drainage: Lhasa]]></description>
        <styleUrl>#icon-1899-0288D1</styleUrl>
        <ExtendedData>
          <Data name="River">
            <value>Pengbo</value>
          </Data>
          <Data name="Locality">
            <value>Jiongba</value>
          </Data>
          <Data name="Collected by/ received from">
            <value>J-G. Wang</value>
          </Data>
          <Data name="Year">
            <value>2017.0</value>
          </Data>
          <Data name="Latitude">
            <value><![CDATA[29°51'25" N]]></value>
          </Data>
          <Data name="Longitude">
            <value><![CDATA[91°21'02" E]]></value>
          </Data>
          <Data name="Drainage">
            <value>Lhasa</value>
          </Data>
        </ExtendedData>
        <Point>
          <coordinates>
            91.3505555555555,29.8569444444444,0
          </coordinates>
        </Point>
      </Placemark>
      <Placemark>
        <name>S4665</name>
        <description><![CDATA[River: Lhasa<br>Locality: Lhasa<br>Collected by/ received from: E.Garzanti/G.Sun<br>Year: 2013<br>Latitude: 29°38'29"N<br>Longitude: 91°08'50" E<br>Drainage: Yarlung Tsangpo]]></description>
        <styleUrl>#icon-1899-0288D1</styleUrl>
        <ExtendedData>
          <Data name="River">
            <value>Lhasa</value>
          </Data>
          <Data name="Locality">
            <value>Lhasa</value>
          </Data>
          <Data name="Collected by/ received from">
            <value>E.Garzanti/G.Sun</value>
          </Data>
          <Data name="Year">
            <value>2013.0</value>
          </Data>
          <Data name="Latitude">
            <value><![CDATA[29°38'29"N]]></value>
          </Data>
          <Data name="Longitude">
            <value><![CDATA[91°08'50" E]]></value>
          </Data>
          <Data name="Drainage">
            <value>Yarlung Tsangpo</value>
          </Data>
        </ExtendedData>
        <Point>
          <coordinates>
            91.1472222222222,29.6413888888889,0
          </coordinates>
        </Point>
      </Placemark>
      <Placemark>
        <name>S4667</name>
        <description><![CDATA[River: Yangbajain<br>Locality: Yangbajain<br>Collected by/ received from: E.Garzanti/G.Sun<br>Year: 2013<br>Latitude: 30°04'55"N<br>Longitude: 90°31'55" E<br>Drainage: Duilong]]></description>
        <styleUrl>#icon-1899-0288D1</styleUrl>
        <ExtendedData>
          <Data name="River">
            <value>Yangbajain</value>
          </Data>
          <Data name="Locality">
            <value>Yangbajain</value>
          </Data>
          <Data name="Collected by/ received from">
            <value>E.Garzanti/G.Sun</value>
          </Data>
          <Data name="Year">
            <value>2013.0</value>
          </Data>
          <Data name="Latitude">
            <value><![CDATA[30°04'55"N]]></value>
          </Data>
          <Data name="Longitude">
            <value><![CDATA[90°31'55" E]]></value>
          </Data>
          <Data name="Drainage">
            <value>Duilong</value>
          </Data>
        </ExtendedData>
        <Point>
          <coordinates>
            90.5319444444444,30.0819444444444,0
          </coordinates>
        </Point>
      </Placemark>
      <Placemark>
        <name>S4668</name>
        <description><![CDATA[River: Gurum<br>Locality: Yangbajain<br>Collected by/ received from: E.Garzanti/G.Sun<br>Year: 2013<br>Latitude: 30°06'02"N<br>Longitude: 90°31'41" E<br>Drainage: Duilong]]></description>
        <styleUrl>#icon-1899-0288D1</styleUrl>
        <ExtendedData>
          <Data name="River">
            <value>Gurum</value>
          </Data>
          <Data name="Locality">
            <value>Yangbajain</value>
          </Data>
          <Data name="Collected by/ received from">
            <value>E.Garzanti/G.Sun</value>
          </Data>
          <Data name="Year">
            <value>2013.0</value>
          </Data>
          <Data name="Latitude">
            <value><![CDATA[30°06'02"N]]></value>
          </Data>
          <Data name="Longitude">
            <value><![CDATA[90°31'41" E]]></value>
          </Data>
          <Data name="Drainage">
            <value>Duilong</value>
          </Data>
        </ExtendedData>
        <Point>
          <coordinates>
            90.5280555555556,30.1005555555556,0
          </coordinates>
        </Point>
      </Placemark>
      <Placemark>
        <name>S4669</name>
        <description><![CDATA[River: Nu<br>Locality: Yangbajain<br>Collected by/ received from: E.Garzanti/G.Sun<br>Year: 2013<br>Latitude: 30°05'44"N<br>Longitude: 90°32'34" E<br>Drainage: Duilong]]></description>
        <styleUrl>#icon-1899-0288D1</styleUrl>
        <ExtendedData>
          <Data name="River">
            <value>Nu</value>
          </Data>
          <Data name="Locality">
            <value>Yangbajain</value>
          </Data>
          <Data name="Collected by/ received from">
            <value>E.Garzanti/G.Sun</value>
          </Data>
          <Data name="Year">
            <value>2013.0</value>
          </Data>
          <Data name="Latitude">
            <value><![CDATA[30°05'44"N]]></value>
          </Data>
          <Data name="Longitude">
            <value><![CDATA[90°32'34" E]]></value>
          </Data>
          <Data name="Drainage">
            <value>Duilong</value>
          </Data>
        </ExtendedData>
        <Point>
          <coordinates>
            90.5427777777778,30.0955555555556,0
          </coordinates>
        </Point>
      </Placemark>
      <Placemark>
        <name>S4666</name>
        <description><![CDATA[River: Duilong<br>Locality: Dagang <br>Collected by/ received from: E.Garzanti/G.Sun<br>Year: 2013<br>Latitude: 29°39'33"N<br>Longitude: 90°57'17" E<br>Drainage: Lhasa]]></description>
        <styleUrl>#icon-1899-0288D1</styleUrl>
        <ExtendedData>
          <Data name="River">
            <value>Duilong</value>
          </Data>
          <Data name="Locality">
            <value>Dagang </value>
          </Data>
          <Data name="Collected by/ received from">
            <value>E.Garzanti/G.Sun</value>
          </Data>
          <Data name="Year">
            <value>2013.0</value>
          </Data>
          <Data name="Latitude">
            <value><![CDATA[29°39'33"N]]></value>
          </Data>
          <Data name="Longitude">
            <value><![CDATA[90°57'17" E]]></value>
          </Data>
          <Data name="Drainage">
            <value>Lhasa</value>
          </Data>
        </ExtendedData>
        <Point>
          <coordinates>
            90.9547222222222,29.6591666666667,0
          </coordinates>
        </Point>
      </Placemark>
      <Placemark>
        <name>TSA-4</name>
        <description><![CDATA[River: Lhasa<br>Locality: Galashan<br>Collected by/ received from: J. Lavé/C.F.Lanord<br>Year: 2007<br>Latitude: 29°26' N<br>Longitude: 90°56' E<br>Drainage: Yarlung Tsangpo]]></description>
        <styleUrl>#icon-1899-0288D1</styleUrl>
        <ExtendedData>
          <Data name="River">
            <value>Lhasa</value>
          </Data>
          <Data name="Locality">
            <value>Galashan</value>
          </Data>
          <Data name="Collected by/ received from">
            <value>J. Lavé/C.F.Lanord</value>
          </Data>
          <Data name="Year">
            <value>2007.0</value>
          </Data>
          <Data name="Latitude">
            <value><![CDATA[29°26' N]]></value>
          </Data>
          <Data name="Longitude">
            <value><![CDATA[90°56' E]]></value>
          </Data>
          <Data name="Drainage">
            <value>Yarlung Tsangpo</value>
          </Data>
        </ExtendedData>
        <Point>
          <coordinates>
            90.9333333333333,29.4333333333333,0
          </coordinates>
        </Point>
      </Placemark>
      <Placemark>
        <name>S4676</name>
        <description><![CDATA[River: Lhasa<br>Locality: Galashan<br>Collected by/ received from: E.Garzanti/G.Sun<br>Year: 2013<br>Latitude: 29°22'44"N<br>Longitude: 90°51'38" E<br>Drainage: Yarlung Tsangpo]]></description>
        <styleUrl>#icon-1899-0288D1</styleUrl>
        <ExtendedData>
          <Data name="River">
            <value>Lhasa</value>
          </Data>
          <Data name="Locality">
            <value>Galashan</value>
          </Data>
          <Data name="Collected by/ received from">
            <value>E.Garzanti/G.Sun</value>
          </Data>
          <Data name="Year">
            <value>2013.0</value>
          </Data>
          <Data name="Latitude">
            <value><![CDATA[29°22'44"N]]></value>
          </Data>
          <Data name="Longitude">
            <value><![CDATA[90°51'38" E]]></value>
          </Data>
          <Data name="Drainage">
            <value>Yarlung Tsangpo</value>
          </Data>
        </ExtendedData>
        <Point>
          <coordinates>
            90.8605555555555,29.3788888888889,0
          </coordinates>
        </Point>
      </Placemark>
      <Placemark>
        <name>16A002</name>
        <description><![CDATA[River: Lhasa<br>Locality: Quxu<br>Collected by/ received from: X. Hu/R,Guo/H.Fu<br>Year: 2016<br>Latitude: 29°22′27″ N<br>Longitude: 90°51′34″ E<br>Drainage: Yarlung Tsangpo]]></description>
        <styleUrl>#icon-1899-0288D1</styleUrl>
        <ExtendedData>
          <Data name="River">
            <value>Lhasa</value>
          </Data>
          <Data name="Locality">
            <value>Quxu</value>
          </Data>
          <Data name="Collected by/ received from">
            <value>X. Hu/R,Guo/H.Fu</value>
          </Data>
          <Data name="Year">
            <value>2016.0</value>
          </Data>
          <Data name="Latitude">
            <value>29°22′27″ N</value>
          </Data>
          <Data name="Longitude">
            <value>90°51′34″ E</value>
          </Data>
          <Data name="Drainage">
            <value>Yarlung Tsangpo</value>
          </Data>
        </ExtendedData>
        <Point>
          <coordinates>
            90.8594444444444,29.3741666666667,0
          </coordinates>
        </Point>
      </Placemark>
      <Placemark>
        <name>S4706</name>
        <description><![CDATA[River: Raka Tsangpo<br>Locality: Sangsang<br>Collected by/ received from: E.Garzanti/X.Hu<br>Year: 2013<br>Latitude: 29°27'18" N<br>Longitude: 86°41'20" E<br>Drainage: Yarlung Tsangpo]]></description>
        <styleUrl>#icon-1899-0288D1</styleUrl>
        <ExtendedData>
          <Data name="River">
            <value>Raka Tsangpo</value>
          </Data>
          <Data name="Locality">
            <value>Sangsang</value>
          </Data>
          <Data name="Collected by/ received from">
            <value>E.Garzanti/X.Hu</value>
          </Data>
          <Data name="Year">
            <value>2013.0</value>
          </Data>
          <Data name="Latitude">
            <value><![CDATA[29°27'18" N]]></value>
          </Data>
          <Data name="Longitude">
            <value><![CDATA[86°41'20" E]]></value>
          </Data>
          <Data name="Drainage">
            <value>Yarlung Tsangpo</value>
          </Data>
        </ExtendedData>
        <Point>
          <coordinates>
            86.6888888888889,29.455,0
          </coordinates>
        </Point>
      </Placemark>
      <Placemark>
        <name>S4758</name>
        <description><![CDATA[River: Raka Tsangpo<br>Locality: Shazhuo<br>Collected by/ received from: W. An<br>Year: 2013<br>Latitude: 29°24'57" N<br>Longitude: 87°55'29" E<br>Drainage: Yarlung Tsangpo]]></description>
        <styleUrl>#icon-1899-0288D1</styleUrl>
        <ExtendedData>
          <Data name="River">
            <value>Raka Tsangpo</value>
          </Data>
          <Data name="Locality">
            <value>Shazhuo</value>
          </Data>
          <Data name="Collected by/ received from">
            <value>W. An</value>
          </Data>
          <Data name="Year">
            <value>2013.0</value>
          </Data>
          <Data name="Latitude">
            <value><![CDATA[29°24'57" N]]></value>
          </Data>
          <Data name="Longitude">
            <value><![CDATA[87°55'29" E]]></value>
          </Data>
          <Data name="Drainage">
            <value>Yarlung Tsangpo</value>
          </Data>
        </ExtendedData>
        <Point>
          <coordinates>
            87.9247222222222,29.4158333333333,0
          </coordinates>
        </Point>
      </Placemark>
      <Placemark>
        <name>TSA-1A </name>
        <description><![CDATA[River: Yarlung Tsangpo<br>Locality: Xigaze<br>Collected by/ received from: J. Lavé/C.F.Lanord<br>Year: 2007<br>Latitude: 29°20' N<br>Longitude: 88°50' E<br>Drainage: Yarlung Tsangpo]]></description>
        <styleUrl>#icon-1899-0288D1</styleUrl>
        <ExtendedData>
          <Data name="River">
            <value>Yarlung Tsangpo</value>
          </Data>
          <Data name="Locality">
            <value>Xigaze</value>
          </Data>
          <Data name="Collected by/ received from">
            <value>J. Lavé/C.F.Lanord</value>
          </Data>
          <Data name="Year">
            <value>2007.0</value>
          </Data>
          <Data name="Latitude">
            <value><![CDATA[29°20' N]]></value>
          </Data>
          <Data name="Longitude">
            <value><![CDATA[88°50' E]]></value>
          </Data>
          <Data name="Drainage">
            <value>Yarlung Tsangpo</value>
          </Data>
        </ExtendedData>
        <Point>
          <coordinates>
            88.8333333333333,29.3333333333333,0
          </coordinates>
        </Point>
      </Placemark>
      <Placemark>
        <name>S1</name>
        <description><![CDATA[River: Yarlung Tsangpo<br>Locality: Xigaze<br>Collected by/ received from: E.Garzanti/C.Miradoli<br>Year: 1994<br>Latitude: 29°20' N<br>Longitude: 88°58' E<br>Drainage: Yarlung Tsangpo]]></description>
        <styleUrl>#icon-1899-0288D1</styleUrl>
        <ExtendedData>
          <Data name="River">
            <value>Yarlung Tsangpo</value>
          </Data>
          <Data name="Locality">
            <value>Xigaze</value>
          </Data>
          <Data name="Collected by/ received from">
            <value>E.Garzanti/C.Miradoli</value>
          </Data>
          <Data name="Year">
            <value>1994.0</value>
          </Data>
          <Data name="Latitude">
            <value><![CDATA[29°20' N]]></value>
          </Data>
          <Data name="Longitude">
            <value><![CDATA[88°58' E]]></value>
          </Data>
          <Data name="Drainage">
            <value>Yarlung Tsangpo</value>
          </Data>
        </ExtendedData>
        <Point>
          <coordinates>
            88.9666666666667,29.3333333333333,0
          </coordinates>
        </Point>
      </Placemark>
      <Placemark>
        <name>S4757</name>
        <description><![CDATA[River: Xiang<br>Locality: Chongdui<br>Collected by/ received from: W. An<br>Year: 2013<br>Latitude: 29°25'56" N<br>Longitude: 89°05'35" E<br>Drainage: Yarlung Tsangpo]]></description>
        <styleUrl>#icon-1899-0288D1</styleUrl>
        <ExtendedData>
          <Data name="River">
            <value>Xiang</value>
          </Data>
          <Data name="Locality">
            <value>Chongdui</value>
          </Data>
          <Data name="Collected by/ received from">
            <value>W. An</value>
          </Data>
          <Data name="Year">
            <value>2013.0</value>
          </Data>
          <Data name="Latitude">
            <value><![CDATA[29°25'56" N]]></value>
          </Data>
          <Data name="Longitude">
            <value><![CDATA[89°05'35" E]]></value>
          </Data>
          <Data name="Drainage">
            <value>Yarlung Tsangpo</value>
          </Data>
        </ExtendedData>
        <Point>
          <coordinates>
            89.0930555555556,29.4322222222222,0
          </coordinates>
        </Point>
      </Placemark>
      <Placemark>
        <name>#1</name>
        <description><![CDATA[River: Nyemo<br>Locality: Nyemo<br>Collected by/ received from: C. France-Lanord<br>Year: 2001<br>Latitude: 29°22' N<br>Longitude: 90°11' E<br>Drainage: Yarlung Tsangpo]]></description>
        <styleUrl>#icon-1899-0288D1</styleUrl>
        <ExtendedData>
          <Data name="River">
            <value>Nyemo</value>
          </Data>
          <Data name="Locality">
            <value>Nyemo</value>
          </Data>
          <Data name="Collected by/ received from">
            <value>C. France-Lanord</value>
          </Data>
          <Data name="Year">
            <value>2001.0</value>
          </Data>
          <Data name="Latitude">
            <value><![CDATA[29°22' N]]></value>
          </Data>
          <Data name="Longitude">
            <value><![CDATA[90°11' E]]></value>
          </Data>
          <Data name="Drainage">
            <value>Yarlung Tsangpo</value>
          </Data>
        </ExtendedData>
        <Point>
          <coordinates>
            90.1833333333333,29.3666666666667,0
          </coordinates>
        </Point>
      </Placemark>
      <Placemark>
        <name>S4678</name>
        <description><![CDATA[River: Nyemo<br>Locality: Luowa<br>Collected by/ received from: E.Garzanti<br>Year: 2013<br>Latitude: 29°21'20" N<br>Longitude: 90°11'25" E<br>Drainage: Yarlung Tsangpo]]></description>
        <styleUrl>#icon-1899-0288D1</styleUrl>
        <ExtendedData>
          <Data name="River">
            <value>Nyemo</value>
          </Data>
          <Data name="Locality">
            <value>Luowa</value>
          </Data>
          <Data name="Collected by/ received from">
            <value>E.Garzanti</value>
          </Data>
          <Data name="Year">
            <value>2013.0</value>
          </Data>
          <Data name="Latitude">
            <value><![CDATA[29°21'20" N]]></value>
          </Data>
          <Data name="Longitude">
            <value><![CDATA[90°11'25" E]]></value>
          </Data>
          <Data name="Drainage">
            <value>Yarlung Tsangpo</value>
          </Data>
        </ExtendedData>
        <Point>
          <coordinates>
            90.1902777777778,29.3555555555556,0
          </coordinates>
        </Point>
      </Placemark>
      <Placemark>
        <name>S4677</name>
        <description><![CDATA[River: Yarlung Tsangpo<br>Locality: Daga<br>Collected by/ received from: E.Garzanti<br>Year: 2013<br>Latitude: 29°19'57" N<br>Longitude: 90°40'56" E<br>Drainage: Yarlung Tsangpo]]></description>
        <styleUrl>#icon-1899-0288D1</styleUrl>
        <ExtendedData>
          <Data name="River">
            <value>Yarlung Tsangpo</value>
          </Data>
          <Data name="Locality">
            <value>Daga</value>
          </Data>
          <Data name="Collected by/ received from">
            <value>E.Garzanti</value>
          </Data>
          <Data name="Year">
            <value>2013.0</value>
          </Data>
          <Data name="Latitude">
            <value><![CDATA[29°19'57" N]]></value>
          </Data>
          <Data name="Longitude">
            <value><![CDATA[90°40'56" E]]></value>
          </Data>
          <Data name="Drainage">
            <value>Yarlung Tsangpo</value>
          </Data>
        </ExtendedData>
        <Point>
          <coordinates>
            90.6822222222222,29.3325,0
          </coordinates>
        </Point>
      </Placemark>
      <Placemark>
        <name>S4664</name>
        <description><![CDATA[River: Yarlung Tsangpo<br>Locality: Jiazhulinzhen<br>Collected by/ received from: E.Garzanti<br>Year: 2013<br>Latitude: 29°19'42" N<br>Longitude: 90°51'47" E<br>Drainage: Yarlung Tsangpo]]></description>
        <styleUrl>#icon-1899-0288D1</styleUrl>
        <ExtendedData>
          <Data name="River">
            <value>Yarlung Tsangpo</value>
          </Data>
          <Data name="Locality">
            <value>Jiazhulinzhen</value>
          </Data>
          <Data name="Collected by/ received from">
            <value>E.Garzanti</value>
          </Data>
          <Data name="Year">
            <value>2013.0</value>
          </Data>
          <Data name="Latitude">
            <value><![CDATA[29°19'42" N]]></value>
          </Data>
          <Data name="Longitude">
            <value><![CDATA[90°51'47" E]]></value>
          </Data>
          <Data name="Drainage">
            <value>Yarlung Tsangpo</value>
          </Data>
        </ExtendedData>
        <Point>
          <coordinates>
            90.8630555555555,29.3283333333333,0
          </coordinates>
        </Point>
      </Placemark>
      <Placemark>
        <name>#2</name>
        <description><![CDATA[River: Yarlung Tsangpo<br>Locality: Gonggar<br>Collected by/ received from: C. France-Lanord<br>Year: 2001<br>Latitude: 29°18' N<br>Longitude: 90°58 E<br>Drainage: Yarlung Tsangpo]]></description>
        <styleUrl>#icon-1899-0288D1</styleUrl>
        <ExtendedData>
          <Data name="River">
            <value>Yarlung Tsangpo</value>
          </Data>
          <Data name="Locality">
            <value>Gonggar</value>
          </Data>
          <Data name="Collected by/ received from">
            <value>C. France-Lanord</value>
          </Data>
          <Data name="Year">
            <value>2001.0</value>
          </Data>
          <Data name="Latitude">
            <value><![CDATA[29°18' N]]></value>
          </Data>
          <Data name="Longitude">
            <value>90°58 E</value>
          </Data>
          <Data name="Drainage">
            <value>Yarlung Tsangpo</value>
          </Data>
        </ExtendedData>
        <Point>
          <coordinates>
            90.9666666666667,29.3,0
          </coordinates>
        </Point>
      </Placemark>
      <Placemark>
        <name>TSA-3</name>
        <description><![CDATA[River: Yarlung Tsangpo<br>Locality: Gonggar<br>Collected by/ received from: J. Lavé/C.F.Lanord<br>Year: 2007<br>Latitude: 29°18' N<br>Longitude: 91°00' E<br>Drainage: Yarlung Tsangpo]]></description>
        <styleUrl>#icon-1899-0288D1</styleUrl>
        <ExtendedData>
          <Data name="River">
            <value>Yarlung Tsangpo</value>
          </Data>
          <Data name="Locality">
            <value>Gonggar</value>
          </Data>
          <Data name="Collected by/ received from">
            <value>J. Lavé/C.F.Lanord</value>
          </Data>
          <Data name="Year">
            <value>2007.0</value>
          </Data>
          <Data name="Latitude">
            <value><![CDATA[29°18' N]]></value>
          </Data>
          <Data name="Longitude">
            <value><![CDATA[91°00' E]]></value>
          </Data>
          <Data name="Drainage">
            <value>Yarlung Tsangpo</value>
          </Data>
        </ExtendedData>
        <Point>
          <coordinates>
            91,29.3,0
          </coordinates>
        </Point>
      </Placemark>
      <Placemark>
        <name>S4421</name>
        <description><![CDATA[River: Nyoma<br>Locality: Nyoma<br>Collected by/ received from: H.Munack/J.Blöthe<br>Year: 2011<br>Latitude: 33°12'40" N<br>Longitude: 78°39'28" E<br>Drainage: Indus]]></description>
        <styleUrl>#icon-1899-0288D1</styleUrl>
        <ExtendedData>
          <Data name="River">
            <value>Nyoma</value>
          </Data>
          <Data name="Locality">
            <value>Nyoma</value>
          </Data>
          <Data name="Collected by/ received from">
            <value>H.Munack/J.Blöthe</value>
          </Data>
          <Data name="Year">
            <value>2011.0</value>
          </Data>
          <Data name="Latitude">
            <value><![CDATA[33°12'40" N]]></value>
          </Data>
          <Data name="Longitude">
            <value><![CDATA[78°39'28" E]]></value>
          </Data>
          <Data name="Drainage">
            <value>Indus</value>
          </Data>
        </ExtendedData>
        <Point>
          <coordinates>
            78.6577777777778,33.2111111111111,0
          </coordinates>
        </Point>
      </Placemark>
      <Placemark>
        <name>S4422</name>
        <description><![CDATA[River: Nogo<br>Locality: Nogo<br>Collected by/ received from: H.Munack/J.Blöthe<br>Year: 2011<br>Latitude: 33°14'37" N<br>Longitude: 78°34'39" E<br>Drainage: Indus]]></description>
        <styleUrl>#icon-1899-0288D1</styleUrl>
        <ExtendedData>
          <Data name="River">
            <value>Nogo</value>
          </Data>
          <Data name="Locality">
            <value>Nogo</value>
          </Data>
          <Data name="Collected by/ received from">
            <value>H.Munack/J.Blöthe</value>
          </Data>
          <Data name="Year">
            <value>2011.0</value>
          </Data>
          <Data name="Latitude">
            <value><![CDATA[33°14'37" N]]></value>
          </Data>
          <Data name="Longitude">
            <value><![CDATA[78°34'39" E]]></value>
          </Data>
          <Data name="Drainage">
            <value>Indus</value>
          </Data>
        </ExtendedData>
        <Point>
          <coordinates>
            78.5775,33.2436111111111,0
          </coordinates>
        </Point>
      </Placemark>
      <Placemark>
        <name>S4423</name>
        <description><![CDATA[River: Chumathang<br>Locality: Chumathang<br>Collected by/ received from: H.Munack/J.Blöthe<br>Year: 2011<br>Latitude: 33°21'36" N<br>Longitude: 78°21'16" E<br>Drainage: Indus]]></description>
        <styleUrl>#icon-1899-0288D1</styleUrl>
        <ExtendedData>
          <Data name="River">
            <value>Chumathang</value>
          </Data>
          <Data name="Locality">
            <value>Chumathang</value>
          </Data>
          <Data name="Collected by/ received from">
            <value>H.Munack/J.Blöthe</value>
          </Data>
          <Data name="Year">
            <value>2011.0</value>
          </Data>
          <Data name="Latitude">
            <value><![CDATA[33°21'36" N]]></value>
          </Data>
          <Data name="Longitude">
            <value><![CDATA[78°21'16" E]]></value>
          </Data>
          <Data name="Drainage">
            <value>Indus</value>
          </Data>
        </ExtendedData>
        <Point>
          <coordinates>
            78.3544444444444,33.36,0
          </coordinates>
        </Point>
      </Placemark>
      <Placemark>
        <name>S4424</name>
        <description><![CDATA[River: Ligchi<br>Locality: Ligchi<br>Collected by/ received from: H.Munack/J.Blöthe<br>Year: 2011<br>Latitude: 33°43'57" N<br>Longitude: 77°57'51" E<br>Drainage: Indus]]></description>
        <styleUrl>#icon-1899-0288D1</styleUrl>
        <ExtendedData>
          <Data name="River">
            <value>Ligchi</value>
          </Data>
          <Data name="Locality">
            <value>Ligchi</value>
          </Data>
          <Data name="Collected by/ received from">
            <value>H.Munack/J.Blöthe</value>
          </Data>
          <Data name="Year">
            <value>2011.0</value>
          </Data>
          <Data name="Latitude">
            <value><![CDATA[33°43'57" N]]></value>
          </Data>
          <Data name="Longitude">
            <value><![CDATA[77°57'51" E]]></value>
          </Data>
          <Data name="Drainage">
            <value>Indus</value>
          </Data>
        </ExtendedData>
        <Point>
          <coordinates>
            77.9641666666667,33.7325,0
          </coordinates>
        </Point>
      </Placemark>
      <Placemark>
        <name>S4425</name>
        <description><![CDATA[River: Igoo<br>Locality: Igoo<br>Collected by/ received from: H.Munack/J.Blöthe<br>Year: 2011<br>Latitude: 33°53'27" N<br>Longitude: 77°46'58" E<br>Drainage: Indus]]></description>
        <styleUrl>#icon-1899-0288D1</styleUrl>
        <ExtendedData>
          <Data name="River">
            <value>Igoo</value>
          </Data>
          <Data name="Locality">
            <value>Igoo</value>
          </Data>
          <Data name="Collected by/ received from">
            <value>H.Munack/J.Blöthe</value>
          </Data>
          <Data name="Year">
            <value>2011.0</value>
          </Data>
          <Data name="Latitude">
            <value><![CDATA[33°53'27" N]]></value>
          </Data>
          <Data name="Longitude">
            <value><![CDATA[77°46'58" E]]></value>
          </Data>
          <Data name="Drainage">
            <value>Indus</value>
          </Data>
        </ExtendedData>
        <Point>
          <coordinates>
            77.7827777777778,33.8908333333333,0
          </coordinates>
        </Point>
      </Placemark>
      <Placemark>
        <name>S4426</name>
        <description><![CDATA[River: Stagmo<br>Locality: Stagmo<br>Collected by/ received from: H.Munack/J.Blöthe<br>Year: 2011<br>Latitude: 34°07'05" N<br>Longitude: 77°42'00" E<br>Drainage: Indus]]></description>
        <styleUrl>#icon-1899-0288D1</styleUrl>
        <ExtendedData>
          <Data name="River">
            <value>Stagmo</value>
          </Data>
          <Data name="Locality">
            <value>Stagmo</value>
          </Data>
          <Data name="Collected by/ received from">
            <value>H.Munack/J.Blöthe</value>
          </Data>
          <Data name="Year">
            <value>2011.0</value>
          </Data>
          <Data name="Latitude">
            <value><![CDATA[34°07'05" N]]></value>
          </Data>
          <Data name="Longitude">
            <value><![CDATA[77°42'00" E]]></value>
          </Data>
          <Data name="Drainage">
            <value>Indus</value>
          </Data>
        </ExtendedData>
        <Point>
          <coordinates>
            77.7,34.1180555555556,0
          </coordinates>
        </Point>
      </Placemark>
      <Placemark>
        <name>S4211</name>
        <description><![CDATA[River: Leh<br>Locality: Leh<br>Collected by/ received from: A.Resentini<br>Year: 2011<br>Latitude: 34°10'03" N<br>Longitude: 77°34'28" E<br>Drainage: Indus]]></description>
        <styleUrl>#icon-1899-0288D1</styleUrl>
        <ExtendedData>
          <Data name="River">
            <value>Leh</value>
          </Data>
          <Data name="Locality">
            <value>Leh</value>
          </Data>
          <Data name="Collected by/ received from">
            <value>A.Resentini</value>
          </Data>
          <Data name="Year">
            <value>2011.0</value>
          </Data>
          <Data name="Latitude">
            <value><![CDATA[34°10'03" N]]></value>
          </Data>
          <Data name="Longitude">
            <value><![CDATA[77°34'28" E]]></value>
          </Data>
          <Data name="Drainage">
            <value>Indus</value>
          </Data>
        </ExtendedData>
        <Point>
          <coordinates>
            77.5744444444444,34.1675,0
          </coordinates>
        </Point>
      </Placemark>
      <Placemark>
        <name>S4427</name>
        <description><![CDATA[River: Phyang<br>Locality: Phyang<br>Collected by/ received from: H.Munack/J.Blöthe<br>Year: 2011<br>Latitude: 34°12'04" N<br>Longitude: 77°30'34" E<br>Drainage: Indus]]></description>
        <styleUrl>#icon-1899-0288D1</styleUrl>
        <ExtendedData>
          <Data name="River">
            <value>Phyang</value>
          </Data>
          <Data name="Locality">
            <value>Phyang</value>
          </Data>
          <Data name="Collected by/ received from">
            <value>H.Munack/J.Blöthe</value>
          </Data>
          <Data name="Year">
            <value>2011.0</value>
          </Data>
          <Data name="Latitude">
            <value><![CDATA[34°12'04" N]]></value>
          </Data>
          <Data name="Longitude">
            <value><![CDATA[77°30'34" E]]></value>
          </Data>
          <Data name="Drainage">
            <value>Indus</value>
          </Data>
        </ExtendedData>
        <Point>
          <coordinates>
            77.5094444444444,34.2011111111111,0
          </coordinates>
        </Point>
      </Placemark>
      <Placemark>
        <name>S4428</name>
        <description><![CDATA[River: Humla <br>Locality: Humla<br>Collected by/ received from: H.Munack/J.Blöthe<br>Year: 2011<br>Latitude: 34°13'13" N<br>Longitude: 77°23'17" E<br>Drainage: Indus]]></description>
        <styleUrl>#icon-1899-0288D1</styleUrl>
        <ExtendedData>
          <Data name="River">
            <value>Humla </value>
          </Data>
          <Data name="Locality">
            <value>Humla</value>
          </Data>
          <Data name="Collected by/ received from">
            <value>H.Munack/J.Blöthe</value>
          </Data>
          <Data name="Year">
            <value>2011.0</value>
          </Data>
          <Data name="Latitude">
            <value><![CDATA[34°13'13" N]]></value>
          </Data>
          <Data name="Longitude">
            <value><![CDATA[77°23'17" E]]></value>
          </Data>
          <Data name="Drainage">
            <value>Indus</value>
          </Data>
        </ExtendedData>
        <Point>
          <coordinates>
            77.3880555555556,34.2202777777778,0
          </coordinates>
        </Point>
      </Placemark>
      <Placemark>
        <name>S1680</name>
        <description><![CDATA[River: Basgo<br>Locality: Basgò<br>Collected by/ received from: H.Sinclair<br>Year: 2001<br>Latitude: 34°13'31" N <br>Longitude: 77°16'24" E <br>Drainage: Indus]]></description>
        <styleUrl>#icon-1899-0288D1</styleUrl>
        <ExtendedData>
          <Data name="River">
            <value>Basgo</value>
          </Data>
          <Data name="Locality">
            <value>Basgò</value>
          </Data>
          <Data name="Collected by/ received from">
            <value>H.Sinclair</value>
          </Data>
          <Data name="Year">
            <value>2001.0</value>
          </Data>
          <Data name="Latitude">
            <value><![CDATA[34°13'31" N ]]></value>
          </Data>
          <Data name="Longitude">
            <value><![CDATA[77°16'24" E ]]></value>
          </Data>
          <Data name="Drainage">
            <value>Indus</value>
          </Data>
        </ExtendedData>
        <Point>
          <coordinates>
            77.2733333333333,34.2252777777778,0
          </coordinates>
        </Point>
      </Placemark>
      <Placemark>
        <name>S4429</name>
        <description><![CDATA[River: Nurla <br>Locality: Nurla<br>Collected by/ received from: H.Munack/J.Blöthe<br>Year: 2011<br>Latitude: 34°18'16" N<br>Longitude: 76°59'12" E<br>Drainage: Indus]]></description>
        <styleUrl>#icon-1899-0288D1</styleUrl>
        <ExtendedData>
          <Data name="River">
            <value>Nurla </value>
          </Data>
          <Data name="Locality">
            <value>Nurla</value>
          </Data>
          <Data name="Collected by/ received from">
            <value>H.Munack/J.Blöthe</value>
          </Data>
          <Data name="Year">
            <value>2011.0</value>
          </Data>
          <Data name="Latitude">
            <value><![CDATA[34°18'16" N]]></value>
          </Data>
          <Data name="Longitude">
            <value><![CDATA[76°59'12" E]]></value>
          </Data>
          <Data name="Drainage">
            <value>Indus</value>
          </Data>
        </ExtendedData>
        <Point>
          <coordinates>
            76.9866666666667,34.3044444444444,0
          </coordinates>
        </Point>
      </Placemark>
      <Placemark>
        <name>S4430</name>
        <description><![CDATA[River: Domkar<br>Locality: Domkar<br>Collected by/ received from: H.Munack/J.Blöthe<br>Year: 2011<br>Latitude: 34°23'30" N<br>Longitude: 76°46'25" E<br>Drainage: Indus]]></description>
        <styleUrl>#icon-1899-0288D1</styleUrl>
        <ExtendedData>
          <Data name="River">
            <value>Domkar</value>
          </Data>
          <Data name="Locality">
            <value>Domkar</value>
          </Data>
          <Data name="Collected by/ received from">
            <value>H.Munack/J.Blöthe</value>
          </Data>
          <Data name="Year">
            <value>2011.0</value>
          </Data>
          <Data name="Latitude">
            <value><![CDATA[34°23'30" N]]></value>
          </Data>
          <Data name="Longitude">
            <value><![CDATA[76°46'25" E]]></value>
          </Data>
          <Data name="Drainage">
            <value>Indus</value>
          </Data>
        </ExtendedData>
        <Point>
          <coordinates>
            76.7736111111111,34.3916666666667,0
          </coordinates>
        </Point>
      </Placemark>
      <Placemark>
        <name>S4431</name>
        <description><![CDATA[River: Skyur<br>Locality: Skurbuchan<br>Collected by/ received from: H.Munack/J.Blöthe<br>Year: 2011<br>Latitude: 34°26'07" N<br>Longitude: 76°42'18" E<br>Drainage: Indus]]></description>
        <styleUrl>#icon-1899-0288D1</styleUrl>
        <ExtendedData>
          <Data name="River">
            <value>Skyur</value>
          </Data>
          <Data name="Locality">
            <value>Skurbuchan</value>
          </Data>
          <Data name="Collected by/ received from">
            <value>H.Munack/J.Blöthe</value>
          </Data>
          <Data name="Year">
            <value>2011.0</value>
          </Data>
          <Data name="Latitude">
            <value><![CDATA[34°26'07" N]]></value>
          </Data>
          <Data name="Longitude">
            <value><![CDATA[76°42'18" E]]></value>
          </Data>
          <Data name="Drainage">
            <value>Indus</value>
          </Data>
        </ExtendedData>
        <Point>
          <coordinates>
            76.705,34.4352777777778,0
          </coordinates>
        </Point>
      </Placemark>
      <Placemark>
        <name>S4432</name>
        <description><![CDATA[River: Hanu Thang<br>Locality: Hanu Thang<br>Collected by/ received from: H.Munack/J.Blöthe<br>Year: 2011<br>Latitude: 34°34'00" N<br>Longitude: 76°35'18" E<br>Drainage: Indus]]></description>
        <styleUrl>#icon-1899-0288D1</styleUrl>
        <ExtendedData>
          <Data name="River">
            <value>Hanu Thang</value>
          </Data>
          <Data name="Locality">
            <value>Hanu Thang</value>
          </Data>
          <Data name="Collected by/ received from">
            <value>H.Munack/J.Blöthe</value>
          </Data>
          <Data name="Year">
            <value>2011.0</value>
          </Data>
          <Data name="Latitude">
            <value><![CDATA[34°34'00" N]]></value>
          </Data>
          <Data name="Longitude">
            <value><![CDATA[76°35'18" E]]></value>
          </Data>
          <Data name="Drainage">
            <value>Indus</value>
          </Data>
        </ExtendedData>
        <Point>
          <coordinates>
            76.5883333333333,34.5666666666667,0
          </coordinates>
        </Point>
      </Placemark>
    </Folder>
  </Document>
</kml>
